1           **RNA-Sequencing of Long-Term Label-Retaining Colon Cancer Stem Cells**  
2                               **Identifies Novel Regulators of Quiescence**

3  
4 Joseph L. Regan<sup>1,2,12\*</sup>, Dirk Schumacher<sup>3,4</sup>, Stephanie Staudte<sup>1,2</sup>, Andreas Steffen<sup>1</sup>, Ralf  
5 Lesche<sup>1,5</sup>, Joern Toedling<sup>1,5</sup>, Thibaud Jourdan<sup>1</sup>, Johannes Haybaeck<sup>6,7</sup>, Dominik  
6 Mumberg<sup>1</sup>, David Henderson<sup>1</sup>, Balázs Györfy<sup>8,9</sup>, Christian R.A. Regenbrecht<sup>3,10,11</sup>, Ulrich  
7 Keilholz<sup>2</sup>, Reinhold Schäfer<sup>2,3,4</sup>, Martin Lange<sup>1,5</sup>

8  
9 **Affiliations**

10 <sup>1</sup>Bayer AG, Drug Discovery, Pharmaceuticals, 13342 Berlin, Germany

11 <sup>2</sup>Charité Comprehensive Cancer Center, Charité - Universitätsmedizin Berlin, 10117

12 Berlin, Germany

13 <sup>3</sup>Laboratory of Molecular Tumor Pathology, Charité Universitätsmedizin Berlin, 10117

14 Berlin, Germany

15 <sup>4</sup>German Cancer Consortium (DKTK), DKFZ, 69120 Heidelberg, Germany

16 <sup>5</sup>Nuvisan ICB GmbH, 13343 Berlin, Germany

17 <sup>6</sup>Department of Pathology, Neuropathology and Molecular Pathology, Medical

18 University of Innsbruck, Austria

19 <sup>7</sup>Diagnostic & Research Center for Molecular Biomedicine, Institute of Pathology,

20 Medical University of Graz, Austria

21 <sup>8</sup>Department of Bioinformatics, Semmelweis University, 1094 Budapest, Hungary

22 <sup>9</sup>TTK Cancer Biomarker Research Group, Institute of Enzymology, 1117 Budapest,

23 Hungary

24 <sup>10</sup>CELLphenomics GmbH, 13125 Berlin, Germany

25 <sup>11</sup>Institute of Pathology, University Medical Center Göttingen, 37075 Göttingen,

26 Germany

27 <sup>12</sup>Lead Contact

28 \*Correspondence: [joseph.regan@charite.de](mailto:joseph.regan@charite.de) (J.L.R.)

29

### 30 **SUMMARY**

31 Recent data suggests that colon tumors contain a subpopulation of therapy resistant

32 quiescent cancer stem cells (qCSCs) that are the source of relapse following treatment.

33 Here, using colon cancer patient-derived organoids (PDOs) and xenograft (PDX) models,

34 we identify a rare population of long-term label-retaining (PKH26<sup>Positive</sup>) qCSCs that can

35 re-enter the cell cycle to generate new tumors. RNA-sequencing analyses demonstrated

36 that these cells are enriched for stem cell associated gene sets such as Wnt and

37 hedgehog signaling, epithelial-to-mesenchymal transition (EMT), embryonic

38 development, tissue development and p53 pathway but have downregulated expression

39 of genes associated with cell cycle, transcription, biosynthesis and metabolism.

40 Furthermore, qCSCs are enriched for p53 interacting negative regulators of cell cycle,

41 including *AKAP12*, *CD82*, *CDKN1A*, *FHL2*, *GPX3*, *KIAA0247*, *LCN2*, *TFF2*, *UNC5B* and

42 *ZMAT3*, that we show are indicators of poor prognosis and may be targeted for qCSC

43 abolition. Interestingly, CD82, KIAA0247 and UNC5B proteins localize to the cell surface

44 and may therefore be potential markers for the prospective isolation of qCSCs. These

45 data support the temporal inhibition of p53 signaling for the elimination of qCSCs and

46 prevention of relapse in colorectal cancer.

47

## 48 **INTRODUCTION**

49 Molecular and functional intra-tumoral heterogeneity contribute to differences in treatment  
50 outcomes between colorectal cancer (CRC) patients with similar mutational profiles<sup>1</sup>.  
51 Studies of functional heterogeneity, as defined by phenotypic differences between cells,  
52 suggest that cancer stem cells (CSCs) are responsible for tumor growth, metastasis and  
53 therapy resistance<sup>2-7</sup>. CSCs share many of the characteristics of normal tissue stem cells,  
54 including unlimited self-renewal, the ability to generate differentiated daughter cells and  
55 chemoresistance<sup>8,9</sup>.

56

57 The normal intestine is maintained by highly clonogenic crypt base LGR5<sup>Positive</sup> stem cells  
58 and also contains a population of rare quiescent (G0 phase) stem cells that act as a  
59 clonogenic reserve capable of re-entering the cell cycle upon perturbation of tissue  
60 homeostasis, e.g. after injury leading to loss of the cycling crypt base stem cells<sup>10-15</sup>.  
61 Cancer often recapitulates the cellular hierarchy of the tissue in which it arises, and recent  
62 evidence suggests that many tumor types contain rare slow cycling / qCSCs<sup>16-27</sup>.  
63 Conventional chemotherapies and radiotherapies target proliferating cells and require  
64 active cycling for induction of apoptosis<sup>1</sup>. In addition, cellular quiescence has been shown  
65 to facilitate immune evasion<sup>28</sup>. Thus, non-dividing qCSCs may escape conventional  
66 therapeutic strategies and represent the source of disease relapse after treatment<sup>2,29-31</sup>.

67

68 Cell cycle activation in qCSCs has been proposed as a therapeutic strategy to sensitize  
69 qCSCs to treatment and lead to long-term disease-free survival without relapse<sup>29,30</sup>.

70 However, the molecular profiling of qCSCs for the identification of novel cell cycle  
71 regulators that do not also perturb cellular homeostasis in healthy tissues has been limited  
72 by both the rarity of qCSCs and the small number of suitable experimental assays  
73 available for their detection. PDOs echo the morphological, differentiation, intratumor  
74 mutational and drug sensitivity status of the original tumor<sup>32,33</sup> and thus provide an  
75 excellent model for the prospective isolation and profiling of qCSCs.

76

77 Strategies for the identification of quiescent cells employ pulse-chase approaches,  
78 including label retention (e.g. BrdU, PKH26, CFSE), wherein dividing cells lose the label  
79 and quiescent or slow cycling cells retain the label for an extended period of time, or the  
80 dilution of histone 2B-GFP (H2B-GFP)<sup>34</sup>. In contrast to the H2B-GFP approach<sup>35</sup>, which  
81 can identify transient quiescent cells, label retention allows for the identification of cells  
82 that remain quiescent from the early stages of tumorigenesis. This is important since cells  
83 selectively surviving chemotherapy have been shown to be the same cells that are  
84 quiescent/slow cycling in untreated tumors and not cells that became quiescent upon drug  
85 treatment<sup>36</sup>. Such label-retaining cells (LRCs) have previously been reported in colon  
86 cancer cell lines, xenografts and, more recently, in PDOs<sup>6,36-38</sup>.

87

88 However, to date, the transcriptomic profiling of qCSCs in CRC patients has been limited  
89 to microarray analyses of transiently slow-cycling H2B-GFP<sup>Positive</sup> cells from a single CRC  
90 patient by Puig *et al.* (2018)<sup>35</sup> and of PKH26<sup>Positive</sup> LRCs from two colon cancer patient-  
91 derived (via spheroid culture) xenograft models by Francescangeli *et al.* (2020)<sup>36</sup>. In  
92 addition, the LRCs reported in the latter study were not functionally tested for proliferative



93 or self-renewal capacity prior to molecular profiling and instead relied on expression of  
94 CD133 as evidence of a stem cell phenotype. CD133 expression is not restricted to stem  
95 cells of the intestine and is expressed on both CSC and differentiated tumor cells<sup>39–42</sup>.

96

97 Here, we report the identification and first whole-transcriptome RNA-sequencing analyses  
98 of label-retaining qCSCs in a panel of PDOs encompassing primary colon tumors and  
99 metastases. These cells maintain a large proliferative capacity, persist long term *in vivo*  
100 and display the molecular hallmarks of quiescent tissue stem cells<sup>43</sup>, including enrichment  
101 for p53 pathway and developmental gene sets alongside downregulation of cell cycle,  
102 transcription, biosynthesis and metabolism genes. In addition, we show that qCSCs are  
103 enriched for p53 interacting negative regulators of cell cycle that we propose may be  
104 targeted for cell cycle activation and the elimination of qCSCs. These data provide a  
105 valuable resource for the development of novel therapeutic strategies geared toward the  
106 elimination of minimal residual disease and the prevention of relapse.

107

## 108 **RESULTS**

109

### 110 **Colon cancer PDOs contain rare label-retaining qCSCs that persist long term *in*** 111 ***vivo***

112 To determine whether PDOs contain non-cycling LRCs, we performed an initial 72 h pulse  
113 chase experiment using CM-DiL dye. PDOs were established as previously  
114 described<sup>44,45</sup>, processed to single cells, uniformly labelled with CM-DiL dye and seeded  
115 in Matrigel culture. CM-DiL is diluted with each cell division, halving its fluorescence

116 between each daughter cell until it becomes undetectable. Non-cycling cells can thus be  
117 identified by their label retention. After 72 h the majority of PDO cells had lost the CM-DiL  
118 dye but some PDOs contained non-cycling LRCs (Figure 1A). To determine the frequency  
119 of these non-cycling (G0) cells we performed EdU cell cycle analysis on a panel of colon  
120 cancer PDOs (Table S1). This analysis demonstrated that PDOs contain non-cycling cells  
121 that do not proliferate and remain in G0 within a 72 h period (Figure 1B and C).

122

123 To determine the long-term proliferative capacity of these non-cycling cells, we labelled  
124 cells with the lipophilic fluorescent dye PKH26. Unlike CM-DiL, which is suitable for short  
125 term label retention studies, PKH26 labelling can be used to identify non-cycling cells for  
126 up to six months (*in vitro* and *in vivo*)<sup>46,47</sup>. PDOs were dissociated to single cells, labelled  
127 with PKH26 and replated in Matrigel culture. After 12 days PDOs were re-processed to  
128 single cells and analyzed by fluorescence assisted cell sorting (FACS). These data  
129 demonstrated that PDOs contain rare, non-cycling, long-term LRCs (Figure 2A and B).  
130 Crucially, FACS isolation and replating of PKH26<sup>Positive</sup> DAPI<sup>Negative</sup> (live) cells from 12 day  
131 cultures demonstrated that they are not label-retaining due to terminal differentiation or  
132 senescence but can re-enter the cell cycle to generate organoids and have a large  
133 proliferative capacity (Figure 2C – F). In addition, non-adherent spheroid formation  
134 assays, the gold standard assay for testing stem cell function *in vitro*<sup>48,49</sup>, showed that  
135 PKH26<sup>Positive</sup> cells are enriched for self-renewing CSCs (Figure 2G).

136

137 In order to test whether these cells also persisted long-term *in vivo* we generated  
138 xenografts by transplanting PKH26 labelled cells. Long-term tracking of LRCs in

139 xenografts requires the slow growth of the tumor. Cells were therefore transplanted at a  
140 low cell number based on knowledge of tumor growth rates from previous limiting dilution  
141 xenotransplantation assays, in which xenografts were generated from 1,000 PDO cells<sup>44</sup>.

142

143 Unlabeled cells, lacking the burden of carrying a fluorescent dye may be at a competitive  
144 advantage over labelled cells. Therefore, immediately prior to transplantation, PKH26  
145 labelled cells were processed by FACS to exclude unlabelled cells and thus ensure that  
146 only live (DAPI<sup>Negative</sup>) PKH26 labelled cells would give rise to tumors. Significantly,  
147 analysis of xenograft tissue demonstrated the presence of PKH26<sup>Positive</sup> LRCs for up to  
148 80 days after transplantation (Figure 2H). Previous studies have observed quiescence to  
149 be a transient state<sup>35</sup>. However, these data demonstrate that quiescence can be stable  
150 and persist long-term from the initial stages of tumor development.

151

### 152 **RNA-sequencing of PKH26<sup>Positive</sup> cells reveals a molecular signature of qCSCs**

153 To generate a molecular profile of qCSCs we carried out RNA-sequencing analyses of  
154 PKH26<sup>Negative</sup> (cycling) and PKH26<sup>Positive</sup> (non-cycling) qCSCs isolated from a panel of six  
155 different PDO models (Table S1) after 12 days in Matrigel culture. These data  
156 demonstrated that PKH26<sup>Positive</sup> qCSCs are enriched for stem cell associated gene sets,  
157 such as embryonic development, organ development, placenta, nervous system  
158 development, EMT, Wnt and hedgehog signaling (Figure 3A).

159

160 At the same time as showing enrichment for genes associated with growth and  
161 development, PKH26<sup>Positive</sup> qCSCs have downregulated cell cycle, transcription, protein

162 synthesis, metabolism and biosynthesis genes (Figure 3B and C). These data are in  
163 agreement with the transcriptional profiles of slow cycling / qCSCs reported in previous  
164 studies<sup>35–37</sup> and demonstrate a common molecular signature of qCSCs.

165

166 The normal intestine also contains quiescent stem cells that can regenerate the damaged  
167 intestine upon loss of crypt base stem cells following injury, although whether cellular  
168 plasticity or distinct cell types are responsible for this remains unclear. *Bmi1*<sup>50</sup>, *Hopx*<sup>51</sup>,  
169 *Lrig1*<sup>52</sup> and *Tert*<sup>53</sup> have previously been reported as markers of quiescent “+4” stem cells,  
170 although subsequent studies have shown that actively cycling crypt base stem cells also  
171 express these markers at equivalent levels<sup>54</sup>. Similarly, we did not detect enhanced  
172 expression of these markers in qCSCs. This is also in agreement with a recent single-cell  
173 RNA-sequencing analyses of the regenerating mouse intestine that identified a damage-  
174 induced quiescent cell type termed revival stem cells (revSCs)<sup>15</sup>. These cells, required  
175 for the regeneration of a functional intestine, are extremely rare during normal  
176 homeostasis and are characterised by enhanced expression of the pro-survival stress  
177 response gene *Clu*<sup>55</sup>. Interestingly, we find that many of the genes that make up the  
178 molecular signature of these quiescent revSCs are also enriched in qCSCs and have  
179 been found to regulate therapy resistance in various types of cancer. These common  
180 genes include *CLU*<sup>56</sup>, *CTSD*<sup>57,58</sup>, *CDKN1A*<sup>59–63</sup>, *EMP1*<sup>64,65</sup>, *MUC3*<sup>66</sup>, *LAMC2*<sup>67</sup>, *KRT19*<sup>68</sup>,  
181 *LGALS3*<sup>69</sup>, *F3*, *ITM2B*, *ITGB4*<sup>70,71</sup>, *CDH17*<sup>72,73</sup> and *GSN*<sup>74,75</sup> (Figure 3E – F, Figure S1  
182 and Supplementary Data File 1). Considering that colon cancer is a heterogeneous tumor  
183 that recapitulates the cellular hierarchy of the intestine, these data suggest that the  
184 qCSCs identified here may be the tumor equivalent of revSCs. However, in contrast to

185 revSCs and previous studies on qCSCs, our data demonstrate that qCSCs are enriched  
186 for p53 signaling (Figure 3A).

187

### 188 **qCSCs are dependent on p53 signaling**

189 Loss of p53 in hematopoietic (HSCs) and neural stem cells (NSCs) causes these cells to  
190 exit quiescence and enter the cell cycle<sup>76–78</sup>. Targeting p53 may have the same effect in  
191 qCSCs but is complicated by the role of p53 as a tumor suppressor and guardian of  
192 homeostasis<sup>79</sup>. However, targeting negative cell cycle regulators downstream of p53 may  
193 provide novel strategies for qCSC elimination without affecting the role of p53 in healthy  
194 cells. Differential gene expression analysis, comparing PKH26<sup>Negative</sup> and PKH26<sup>Positive</sup>  
195 cells, identified the negative cell-cycle regulators *AKAP12*<sup>80–83</sup>, *CD82*<sup>84</sup>, *CDKN1A*<sup>85–88</sup>,  
196 *FHL2*<sup>89–92</sup>, *GPX3*<sup>93–95</sup>, *KIAA0247*<sup>96,97</sup>, *LCN2*<sup>98–100</sup>, *TFF2*<sup>101–105</sup>, *UNC5B*<sup>106–108</sup> and  
197 *ZMAT3*<sup>109,110</sup> to be enriched in qCSCs (Figure 3D). Significantly, each of these genes is  
198 a target of p53<sup>79,80,82,92,96,109,111–115</sup>, and with the exceptions of *LCN2* and *ZMAT3*,  
199 associated with reduced survival in CRC (Figure 4A). Interestingly, *CD82*, *KIAA0247* and  
200 *UNC5B* proteins localize to the cell surface and may therefore have potential as new  
201 markers for the prospective isolation of qCSCs in CRC. Indeed, *CD82* has previously  
202 been identified as a marker for prospectively isolating stem cells from human fetal and  
203 adult skeletal muscle and is a functional surface marker of long-term HSCs<sup>84,116</sup>.

204

205 Deletion of *CDKN1A* (P21), which is the downstream mediator of p53 induced cell cycle  
206 arrest<sup>86,117</sup>, leads to cell cycle activation and exhaustion of quiescent HSCs and  
207 NSCs<sup>118,119</sup>. In addition, *CDKN1A* is highly expressed in noncycling intestinal crypt base

208 stem cells<sup>52</sup> and revSCs<sup>15</sup>. We therefore selected *CDKN1A* as a candidate gene to  
209 determine whether targeting the p53 pathway would eliminate qCSCs. Significantly,  
210 shRNA mediated knockdown of *CDKN1A* (Figure S3) in PKH26 labelled qCSCs resulted  
211 in the elimination of PKH26<sup>Positive</sup> label-retaining qCSCs (Figure 4B and C).

212

## 213 **DISCUSSION**

214 Colon cancer is a heterogeneous tumor entity containing a subpopulation of qCSCs that  
215 may promote tumor cell heterogeneity, plasticity, and resistance to various types of  
216 stress, including resistance to conventional treatments<sup>29</sup>. However, the rarity and  
217 plasticity of qCSCs has made them an elusive and challenging cell state to define and  
218 target. Here, we provide the first whole-transcriptome analyses of a population of colon  
219 cancer patient-derived long-term label-retaining qCSCs and identify genes that may  
220 provide novel targets for their elimination.

221

222 Label retention has previously been used as a strategy for the isolation of both healthy  
223 quiescent tissue stem cells and qCSCs from a variety of cancer types<sup>11,17,25,26,29,120–122</sup>. In  
224 agreement with these studies, we show that PKH26<sup>Positive</sup> LRCs isolated from colon  
225 cancer PDOs are qCSCs capable of entering the cell cycle and self-renewing after  
226 replating in adherent and non-adherent cell culture conditions and maintain long-term  
227 quiescence in xenograft models. Interestingly, *in vivo* these cells were located at the  
228 tumor border, suggesting that quiescence may be induced at the invasive tumor front  
229 where such cells may be primed for metastatic dissemination. This is in agreement with

230 previous studies showing cell cycle arrest / decreased proliferation and increased levels  
231 of Wnt signaling at the invasive front of colorectal tumors<sup>123–127</sup>.

232

233 RNA-sequencing of qCSCs demonstrated that they display the molecular hallmarks of  
234 quiescence<sup>128</sup> while also being enriched for the same developmental and stem cell  
235 associated gene sets previously described for actively cycling ALDH<sup>Positive</sup> CSCs<sup>44</sup>, which  
236 unlike PKH26<sup>Positive</sup> LRCs are enriched in PDOs.

237

238 We previously reported that hedgehog signaling in active colon CSCs is non-canonical  
239 (SHH-dependent, PTCH-dependent, SMO-independent, GLI-independent) and acts as a  
240 positive regulator of Wnt signaling for CSC survival<sup>44</sup>. In agreement with our work, a  
241 subsequent study from Buczacki *et al.* (2018) demonstrated that qCSC survival in CRC  
242 is also dependent on non-canonical hedgehog signaling mediated regulation of Wnt  
243 signaling<sup>37</sup>. In addition, several of the genes common to both the revSCs reported by  
244 Ayyaz *et al* (2019)<sup>15</sup> and qCSCs, namely CLU<sup>129</sup>, CTSD<sup>130</sup>, CDKN1A<sup>131</sup>, EMP1<sup>132</sup>,  
245 MUC3<sup>133</sup>, LAMC2<sup>134</sup>, KRT19<sup>135</sup>, LGALS3<sup>136</sup>, F3<sup>137,138</sup>, ITGB4<sup>139</sup>, CDH17<sup>140</sup> and GSN<sup>141</sup>,  
246 are targets and/or regulators of Wnt signaling. Overall, these data demonstrate that both  
247 cycling and non-cycling CSCs share overlapping molecular profiles and further support  
248 the targeting of non-canonical hedgehog signaling to prevent disease relapse<sup>37,44,142</sup>.

249

250 However, the molecular mechanisms that distinguish non-cycling qCSCs from cycling  
251 CSCs required further elucidation. p53 plays a crucial role in regulating cellular stress  
252 responses such as DNA-damage repair, senescence, apoptosis and cell cycle arrest in

253 virtually all cell types<sup>87,143</sup>. In addition, it is an important regulator of stem cell self-renewal  
254 and differentiation in embryonic and adult tissue stem cells<sup>77,144,145</sup> and cancer stem  
255 cells<sup>146–148</sup>. Significantly, it has also been demonstrated to be essential for the  
256 maintenance of quiescence in HSCs, NSCs, muscle stem cells and lung progenitor  
257 cells<sup>76,78,149–151</sup>.

258

259 Here we show that qCSCs, in contrast to cycling ALDH<sup>Positive</sup> CSCs<sup>44</sup>, are enriched for  
260 p53 signaling genes. p53 is mutated in 40 - 50% of CRCs. Reflecting this, half the tumors  
261 included in our study contain a p53 mutation (Table S1). However, regardless of mutation  
262 status, p53 appears to be functional in all the PDO models analyzed, as observed by p53-  
263 dependent expression of *CDKN1A* (Figure 3D)<sup>152,153</sup>.

264

265 Inhibiting the p53 pathway may therefore provide novel therapeutic “lock-out” strategies  
266 to induce the proliferation of qCSCs and thereby sensitize them to chemotherapeutics  
267 and prevent relapse<sup>128,154,155</sup>. Considering the role of p53 as a tumor suppressor and  
268 guardian of homeostasis in healthy tissues, as well as its inactivation in many cancers,  
269 most strategies to date have focused on the development of p53 activators<sup>156</sup>. However,  
270 our data, and others, suggest that strategies that activate p53 may lead to therapy  
271 resistance. For example, in breast cancer p53 induces senescence, drives resistance to  
272 therapy and is associated with poor therapeutic response and overall survival<sup>157,158</sup>.

273

274 Inhibiting p53 could interfere with its role in normal tissue homeostasis or lead to the  
275 activation of senescent cancer cells in other tissues. However, healthy cells have lower



276 p53 expression levels than cancer cells<sup>159</sup> and single dose treatments, that avoid the  
277 unwanted consequences of sustained p53 inhibition, may be sufficient to eliminate  
278 qCSCs. This was recently demonstrated by Webster *et al.* (2020) in melanoma, where a  
279 single dose of p53 inhibitor during the early stage of BRAF/MEK inhibitor treatment  
280 resulted in improved response to therapy<sup>160</sup>.

281  
282 In addition, targeting negative cell cycle regulators downstream of p53, such as those  
283 identified here (*AKAP12*<sup>80–83</sup>, *CD82*<sup>84,112</sup>, *CDKN1A*<sup>85–88</sup>, *FHL2*<sup>89–92</sup>, *GPX3*<sup>93–95</sup>,  
284 *KIAA0247*<sup>96,97</sup>, *LCN2*<sup>98–100,115</sup>, *TFF2*<sup>101–105</sup>, *UNC5B*<sup>106–108</sup> and *ZMAT3*<sup>109,110</sup>), may provide  
285 novel strategies for activating cell cycle in qCSCs without affecting the role of p53 in  
286 healthy cells. For example, p53-dependent activation of p21 (*CDKN1A*), which we show  
287 is required for the maintenance of qCSCs, is an important axis in senescence-dependent  
288 tumor suppression. However, despite p21 playing an important role in mediating the p53-  
289 dependent cellular response to stress, lack of p21 does not promote tumor  
290 development<sup>161</sup>. Furthermore, p21 maintains CSC self-renewal, limits proliferation and  
291 confers therapy resistance in numerous cancers types in which its temporal inhibition has  
292 been proposed as a strategy to overcome resistance to DNA-damaging chemotherapy  
293 and radiation<sup>60–63,162–166</sup>. Indeed, several small molecule inhibitors of p21 have been  
294 reported, including butyrolactone I<sup>167</sup>, LLW10<sup>168</sup>, sorafenib<sup>169</sup> and UC2288<sup>170</sup>, that could  
295 serve as novel drugs for the elimination of therapy resistant qCSCs.

296  
297 These data demonstrate the existence of long-term p53-dependent qCSCs in colon  
298 cancer and provide evidence supporting the temporal inhibition of p53 signaling, in

299 combination with standard-of-care treatments, for the elimination of qCSCs and  
300 prevention of disease relapse. The p53 target genes identified here, along with the  
301 publication of our qCSC whole-transcriptome data, will provide a valuable resource for  
302 the development of such therapeutic strategies in the future.

303

## 304 **EXPERIMENTAL PROCEDURES**

305

### 306 **Human tissue samples and establishment of patient-derived cancer organoid cell** 307 **cultures**

308 Tumor material was obtained with informed consent from CRC patients under approval  
309 from the local Institutional Review Board of Charité University Medicine (Charité Ethics  
310 Cie: Charitéplatz 1, 10117 Berlin, Germany) (EA 1/069/11) and the ethics committee of  
311 the Medical University of Graz and the ethics committee of the St John of God Hospital  
312 Graz (23-015 ex 10/11). Tumor staging was carried out by experienced and board-  
313 certified pathologists (Table S1). Cancer organoid cultures were established and  
314 propagated as described<sup>45,171</sup>.

315

### 316 **Cell cycle analysis and colony forming assays**

317 Cell cycle analysis was carried using the Click-iT EdU assay (Invitrogen, #C10337) and  
318 assessed by FACS on a BD LSR II analyzer. For colony forming assays, PDOs were  
319 processed to single cells and labelled with CellTracker™ CM-Dil fluorescent dye (C7000,  
320 Thermo Fisher) or PKH26 (PKH26GL, Sigma-Aldrich) following manufacturer's  
321 instructions and DAPI (to exclude dead cells). PKH26<sup>Positive</sup> DAPI<sup>Negative</sup> (live) cells were

322 sorted by FACS (BD FACS Aria II) into adherent Matrigel culture. After 12 days, PDOs  
323 were once again processed to single cells and sorted by FACS, seeding PKH26<sup>Positive</sup>  
324 DAPI<sup>Negative</sup> cells and PKH26<sup>Negative</sup> DAPI<sup>Negative</sup> cells separately at limiting dilution into 96-  
325 well adherent Matrigel and 384-well non-adherent ultra-low attachment plates at a  
326 frequency of 100 and 1 cell per well, respectively. The purity of the sorted PKH26<sup>Positive</sup>  
327 cell population was confirmed by post-sort FACS analysis. PDO sizes were determined  
328 by ImageJ software analysis. Ultra-low attachment wells containing spheroids were  
329 counted and used to calculate the CSC frequency using ELDA software  
330 (<http://bioinf.wehi.edu.au/software/elda/index.html>; Hu and Smyth, 2009).

331

### 332 **Xenotransplantation**

333 Housing and handling of animals followed European and German Guidelines for  
334 Laboratory Animal Welfare. Animal experiments were conducted in accordance with  
335 animal welfare law, approved by local authorities, and in accordance with the ethical  
336 guidelines of Bayer AG. PDOs were processed to single cells and labelled with PKH26  
337 (PKH26GL, Sigma-Aldrich) following manufacturer's instructions and DAPI (to exclude  
338 dead cells). PKH26<sup>Positive</sup> DAPI<sup>Negative</sup> cells were collected by FACS and immediately  
339 transplanted by injected subcutaneously in PBS and Matrigel (1:1 ratio) into female 8 –  
340 10-week-old nude<sup>-/-</sup> mice at 1000 cells per animal. The purity of the sorted PKH26<sup>Positive</sup>  
341 cell population was confirmed by post-sort FACS analysis.

342

### 343 **Immunofluorescence staining**

344 Tumors were fixed in 4% paraformaldehyde overnight and cryopreserved in OCT  
345 compound. Immunohistochemistry of frozen sections was carried out via standard  
346 techniques with  $\alpha$ -Tubulin (T5168, mouse monoclonal, Sigma; diluted 1:1000) and a  
347 secondary conjugated antibody at room temperature for 2 hours. For  
348 immunofluorescence imaging of PDOs, cultures were fixed in 4% paraformaldehyde for  
349 30 min at room temperature and permeabilized with 0.1% Triton X-100 for 30 min and  
350 blocked in phosphate-buffered saline (PBS) with 10% bovine serum albumin (BSA). F-  
351 actin was stained with Alexa Fluor® 647 Phalloidin (#A22287, Thermo Fisher; diluted  
352 1:20) for 30 min at room temperature. Nuclei were counterstained with DAPI. Negative  
353 controls were performed using the same protocol with substitution of the primary antibody  
354 with IgG-matched controls. Cancer organoids were then transferred to microscope slides  
355 for examination using a Zeiss LSM 700 Laser Scanning Microscope.

356

### 357 **RNA Sequencing**

358 Cells were lysed in RLT buffer and processed for RNA using the RNeasy Mini Plus RNA  
359 extraction kit (Qiagen). Samples were processed using NuGEN's Ovation RNA-Seq  
360 System V2 and Ultralow V2 Library System and sequenced on an Illumina HiSeq 2500  
361 machine as 2x125nt paired-end reads. The raw data in Fastq format were checked for  
362 sample quality using our internal NGS QC pipeline. Reads were mapped to the human  
363 reference genome (assembly hg19) using the STAR aligner (version 2.4.2a). Total read  
364 counts per gene were computed using the program "featureCounts" (version 1.4.6-p2) in  
365 the "subread" package, with the gene annotation taken from Gencode (version 19).

366 Variance-stabilising transformation from the Bioconductor package DESeq2<sup>172</sup> was used  
367 for normalisation and differential-expression analysis.

368

### 369 **Viral transduction**

370 Cells were seeded in 100 µl volumes of antibiotic free culture media at 1.0 x10<sup>5</sup> cells per  
371 well in ultra-low attachment 96-well plates. Control and shRNA lentiviruses were  
372 purchased from Sigma-Aldrich (Table S2). Viral particles were added at a multiplicity of  
373 infection of 1. Cells were transduced for up to 96 h or until GFP positive cells were  
374 observed before being embedded in Matrigel for the establishment of lentiviral transduced  
375 cancer organoid cultures. Puromycin (2 µg/ml) was used to keep the cells under selection.

376

### 377 **Gene expression analysis**

378 For quantitative real-time RT-PCR analysis RNA was isolated using the RNeasy Mini Plus  
379 RNA extraction kit (Qiagen). cDNA synthesis was carried out using a Sensiscript RT kit  
380 (Qiagen). RNA was transcribed into cDNA using an oligo dTn primer (Promega) per  
381 reaction. Gene expression analysis was performed using TaqMan® Gene Expression  
382 Assays (Applied Biosystems) (Table S3) on an ABI Prism 7900HT sequence detection  
383 system (Applied Biosystems). GAPDH was used as an endogenous control and results  
384 were calculated using the  $\Delta\text{-}\Delta\text{Ct}$  method. Data were expressed as the mean fold gene  
385 expression difference in three independently isolated cell preparations over a comparator  
386 sample with 95% confidence intervals. Survival curves were generated using the Kaplan-  
387 Meier Plotter ([www.kmplot.com/analysis](http://www.kmplot.com/analysis))<sup>173</sup>. Gene ontology enrichment analysis was  
388 carried out using the Gene Ontology Resource ([www.geneontology.org](http://www.geneontology.org))<sup>174,175</sup>.

389

390 **Statistical analysis**

391 GraphPad Prism 8.0 was used for data analysis and imaging. All data are presented as  
392 the means  $\pm$  SD, followed by determining significant differences using the two-tailed t test.  
393 Significance of RT-PCR data was determined by inspection of error bars as described by  
394 Cumming *et al.* (2007)<sup>176</sup>. Gene set enrichment analysis was carried out using pre-ranked  
395 feature of the Broad Institute GSEA software version 2 using msigdb v5.1 gene sets<sup>177,178</sup>.  
396 The ranking list was derived from the fold changes calculated from the differential gene  
397 expression calculation and nominal p-values. P-values  $<0.05$  were considered as  
398 statistically significant. The representation factor and the associated probability of finding  
399 an overlap were calculated using <http://nemates.org/MA/progs/representation.stats.html>.  
400 Survival curves were generated using the Kaplan-Meier Plotter  
401 ([www.kmplot.com/analysis](http://www.kmplot.com/analysis))<sup>173</sup>. For the final list of significant genes, False Discovery Rate  
402 (FDR) was computed using the Benjamini-Hochberg method<sup>179</sup>.

403

404 **Acknowledgements**

405 We thank Dorothea Przybilla, and Cathrin Davies (Laboratory of Molecular Tumor  
406 Pathology, Charité Universitätsmedizin Berlin, Germany) for technical and cell culture  
407 assistance. The research leading to these results has received support from the  
408 Innovative Medicines Initiative Joint Undertaking under Grant Agreement 115234  
409 (OncoTrack), the resources of which are composed of financial contribution from the  
410 European Union Seventh Framework Programme (FP7/2007-2013) and EFPIA

411 companies in kind contribution. A.S., T.J., D.M. and D.H. are employees of Bayer AG.  
412 R.L., J.T. and M.L. are employees of Nuvisan ICB GmbH. C.R.A.R.

413

#### 414 **Authors Contribution**

415 Conceptualization, J.L.R.; Methodology, J.L.R.; Investigation, J.L.R., D.S., S.S., A.S.,  
416 R.L., J.T., T.J., J.H., and M.L.; Writing, J.L.R.; Visualization, J.L.R; Data Curation, A.S.,  
417 J.T.; Resources, J.H., U.K., C.R.A.R. and B.G.; Supervision, J.L.R., D.M., D.H., R.S., and  
418 M.L.

419

#### 420 **Accession Numbers**

421 Array data are available in the ArrayExpress database ([www.ebi.ac.uk/arrayexpress](http://www.ebi.ac.uk/arrayexpress))  
422 under accession number E-MTAB-8924.

423

#### 424 **References**

- 425 1. Kreso, A. *et al.* Variable Clonal Repopulation Dynamics Influence Chemotherapy  
426 Response in Colorectal Cancer. *Science (80-. )*. **339**, 543–548 (2013).
- 427 2. De Angelis, M. L., Francescangeli, F., La Torre, F. & Zeuner, A. Stem Cell  
428 Plasticity and Dormancy in the Development of Cancer Therapy Resistance .  
429 *Frontiers in Oncology* **9**, 626 (2019).
- 430 3. Barker, N. *et al.* Crypt stem cells as the cells-of-origin of intestinal cancer. *Nature*  
431 **457**, 608 (2008).
- 432 4. Shackleton, M., Quintana, E., Fearon, E. R. & Morrison, S. J. Heterogeneity in  
433 cancer: cancer stem cells versus clonal evolution. *Cell* **138**, 822–9 (2009).

- 434 5. O'Brien, C. A., Pollett, A., Gallinger, S. & Dick, J. E. A human colon cancer cell  
435 capable of initiating tumour growth in immunodeficient mice. *Nature* **445**, 106–110  
436 (2007).
- 437 6. Moore, N., Houghton, J. & Lyle, S. Slow-Cycling Therapy-Resistant Cancer Cells.  
438 *Stem Cells Dev.* **21**, 1822–1830 (2011).
- 439 7. Brock, A. & Huang, S. Precision Oncology: Between Vaguely Right and Precisely  
440 Wrong. *Cancer Res.* **77**, 6473 LP – 6479 (2017).
- 441 8. Reya, T., Morrison, S. J., Clarke, M. F. & Weissman, I. L. Stem cells, cancer, and  
442 cancer stem cells. *Nature* **414**, 105–111 (2001).
- 443 9. Sell, S. Stem cell origin of cancer and differentiation therapy. **51**, 1–28 (2004).
- 444 10. Clevers, H. A unifying theory for the crypt. *Nature* **495**, 53–54 (2013).
- 445 11. Buczacki, S. J. A. *et al.* Intestinal label-retaining cells are secretory precursors  
446 expressing Lgr5. *Nature* **495**, 65–69 (2013).
- 447 12. Barker, N. *et al.* Identification of stem cells in small intestine and colon by marker  
448 gene Lgr5. *Nature* **449**, 1003–7 (2007).
- 449 13. Cheng, H. & Leblond, C. P. Origin, differentiation and renewal of the four main  
450 epithelial cell types in the mouse small intestine V. Unitarian theory of the origin of  
451 the four epithelial cell types. *Am. J. Anat.* **141**, 537–561 (1974).
- 452 14. POTTEN, C. S. Extreme sensitivity of some intestinal crypt cells to X and  $\gamma$   
453 irradiation. *Nature* **269**, 518–521 (1977).
- 454 15. Ayyaz, A. *et al.* Single-cell transcriptomes of the regenerating intestine reveal a  
455 revival stem cell. *Nature* **569**, 121–125 (2019).
- 456 16. Chen, J. *et al.* A restricted cell population propagates glioblastoma growth after



- 457 chemotherapy. *Nature* **488**, 522–526 (2012).
- 458 17. Dembinski, J. L. & Krauss, S. Characterization and functional analysis of a slow  
459 cycling stem cell-like subpopulation in pancreas adenocarcinoma. *Clin. Exp.*  
460 *Metastasis* **26**, 611 (2009).
- 461 18. Vanner, R. J. *et al.* Quiescent Sox2<sup>+</sup> Cells Drive Hierarchical Growth and Relapse  
462 in Sonic Hedgehog Subgroup Medulloblastoma. *Cancer Cell* **26**, 33–47 (2014).
- 463 19. Zeuner, A. *et al.* Elimination of quiescent/slow-proliferating cancer stem cells by  
464 Bcl-XL inhibition in non-small cell lung cancer. *Cell Death Differ.* **21**, 1877–1888  
465 (2014).
- 466 20. Ebinger, S. *et al.* Characterization of Rare, Dormant, and Therapy-Resistant Cells  
467 in Acute Lymphoblastic Leukemia. *Cancer Cell* **30**, 849–862 (2016).
- 468 21. Gao, M.-Q., Choi, Y.-P., Kang, S., Youn, J. H. & Cho, N.-H. CD24<sup>+</sup> cells from  
469 hierarchically organized ovarian cancer are enriched in cancer stem cells.  
470 *Oncogene* **29**, 2672–2680 (2010).
- 471 22. Kabraji, S. *et al.* AKT1<sup>low</sup> quiescent cancer cells persist after neoadjuvant  
472 chemotherapy in triple negative breast cancer. *Breast Cancer Res.* **19**, 88 (2017).
- 473 23. Lagadinou, E. D. *et al.* BCL-2 Inhibition Targets Oxidative Phosphorylation and  
474 Selectively Eradicates Quiescent Human Leukemia Stem Cells. *Cell Stem Cell*  
475 **12**, 329–341 (2013).
- 476 24. Lin, W. *et al.* Dormant Cancer Cells Contribute to Residual Disease in a Model of  
477 Reversible Pancreatic Cancer. *Cancer Res.* **73**, 1821 LP – 1830 (2013).
- 478 25. Pece, S. *et al.* Biological and molecular heterogeneity of breast cancers correlates  
479 with their cancer stem cell content. *Cell* **140**, 62–73 (2010).

- 480 26. Roesch, A. *et al.* A Temporarily Distinct Subpopulation of Slow-Cycling Melanoma  
481 Cells Is Required for Continuous Tumor Growth. *Cell* **141**, 583–594 (2010).
- 482 27. Saito, Y. *et al.* Induction of cell cycle entry eliminates human leukemia stem cells  
483 in a mouse model of AML. *Nat. Biotechnol.* **28**, 275–280 (2010).
- 484 28. Malladi, S. *et al.* Metastatic Latency and Immune Evasion through Autocrine  
485 Inhibition of WNT. *Cell* **165**, 45–60 (2016).
- 486 29. Moore, N. & Lyle, S. Quiescent, slow-cycling stem cell populations in cancer: a  
487 review of the evidence and discussion of significance. *J. Oncol.* **2011**, 396076  
488 (2011).
- 489 30. Chen, W., Dong, J., Haiech, J., Kilhoffer, M.-C. & Zeniou, M. Cancer Stem Cell  
490 Quiescence and Plasticity as Major Challenges in Cancer Therapy. *Stem Cells*  
491 *Int.* **2016**, 1740936 (2016).
- 492 31. Shen, S., Vagner, S. & Robert, C. Persistent Cancer Cells: The Deadly Survivors.  
493 *Cell* **183**, 860–874 (2020).
- 494 32. Roerink, S. F. *et al.* Intra-tumour diversification in colorectal cancer at the single-  
495 cell level. *Nature* **556**, 457–462 (2018).
- 496 33. Fujii, M. & Sato, T. Somatic cell-derived organoids as prototypes of human  
497 epithelial tissues and diseases. *Nat. Mater.* **20**, 156–169 (2021).
- 498 34. Blanpain, C. & Simons, B. D. Unravelling stem cell dynamics by lineage tracing.  
499 *Nat. Rev. Mol. Cell Biol.* **14**, 489–502 (2013).
- 500 35. Puig, I. *et al.* TET2 controls chemoresistant slow-cycling cancer cell survival and  
501 tumor recurrence. *J. Clin. Invest.* **128**, 3887–3905 (2018).
- 502 36. Francescangeli, F. *et al.* A pre-existing population of ZEB2+ quiescent cells with

- 503 stemness and mesenchymal features dictate chemoresistance in colorectal  
504 cancer. *J. Exp. Clin. Cancer Res.* **39**, 2 (2020).
- 505 37. Buczacki, S. J. A. *et al.* Itraconazole targets cell cycle heterogeneity in colorectal  
506 cancer. *J. Exp. Med.* **215**, 1891 LP – 1912 (2018).
- 507 38. Francescangeli, F. *et al.* Proliferation State and Polo-Like Kinase1 Dependence of  
508 Tumorigenic Colon Cancer Cells. *Stem Cells* **30**, 1819–1830 (2012).
- 509 39. Shmelkov, S. V *et al.* CD133 expression is not restricted to stem cells, and both  
510 CD133+ and CD133– metastatic colon cancer cells initiate tumors. *J. Clin. Invest.*  
511 **118**, 2111–2120 (2008).
- 512 40. Kemper, K. *et al.* The AC133 Epitope, but not the CD133 Protein, Is Lost upon  
513 Cancer Stem Cell Differentiation. *Cancer Res.* **70**, 719 LP – 729 (2010).
- 514 41. Snippert, H. J. *et al.* Prominin-1/CD133 Marks Stem Cells and Early Progenitors  
515 in Mouse Small Intestine. *Gastroenterology* **136**, 2187-2194.e1 (2009).
- 516 42. Glumac, P. M. & LeBeau, A. M. The role of CD133 in cancer: a concise review.  
517 *Clin. Transl. Med.* **7**, 18 (2018).
- 518 43. Cheung, T. H. & Rando, T. A. Molecular regulation of stem cell quiescence. *Nat.*  
519 *Rev. Mol. Cell Biol.* **14**, 329–340 (2013).
- 520 44. Regan, J. L. *et al.* Non-Canonical Hedgehog Signaling Is a Positive Regulator of  
521 the WNT Pathway and Is Required for the Survival of Colon Cancer Stem Cells.  
522 *Cell Rep.* **21**, 2813–2828 (2017).
- 523 45. Schütte, M. *et al.* Molecular dissection of colorectal cancer in pre-clinical models  
524 identifies biomarkers predicting sensitivity to EGFR inhibitors. *Nat. Commun.* **8**,  
525 (2017).

- 526 46. Horan, P. K., Melnicoff, M. J., Jensen, B. D. & Slezak, S. E. Chapter 42  
527 Fluorescent Cell Labeling for in Vivo and in Vitro Cell Tracking. in 469–490  
528 (1990). doi:10.1016/S0091-679X(08)60547-6
- 529 47. Cicalese, A. *et al.* The Tumor Suppressor p53 Regulates Polarity of Self-  
530 Renewing Divisions in Mammary Stem Cells. *Cell* **138**, 1083–1095 (2009).
- 531 48. Ricci-Vitiani, L. *et al.* Identification and expansion of human colon-cancer-initiating  
532 cells. *Nature* **445**, 111–115 (2007).
- 533 49. Weiswald, L.-B., Bellet, D. & Dangles-Marie, V. Spherical Cancer Models in  
534 Tumor Biology. *Neoplasia* **17**, 1–15 (2015).
- 535 50. Yan, K. S. *et al.* The intestinal stem cell markers Bmi1 and Lgr5 identify two  
536 functionally distinct populations. *Proc. Natl. Acad. Sci.* **109**, 466 LP – 471 (2012).
- 537 51. Takeda, N. *et al.* Interconversion between intestinal stem cell populations in  
538 distinct niches. *Science* **334**, 1420–1424 (2011).
- 539 52. Powell, A. E. *et al.* The Pan-ErbB Negative Regulator Lrig1 Is an Intestinal Stem  
540 Cell Marker that Functions as a Tumor Suppressor. *Cell* **149**, 146–158 (2012).
- 541 53. Montgomery, R. K. *et al.* Mouse telomerase reverse transcriptase (mTert)  
542 expression marks slowly cycling intestinal stem cells. *Proc. Natl. Acad. Sci. U. S.*  
543 *A.* **108**, 179–184 (2011).
- 544 54. Muñoz, J. *et al.* The Lgr5 intestinal stem cell signature: robust expression of  
545 proposed quiescent ‘+4’ cell markers. *EMBO J.* **31**, 3079–3091 (2012).
- 546 55. Zhang, F. *et al.* Clusterin facilitates stress-induced lipidation of LC3 and  
547 autophagosome biogenesis to enhance cancer cell survival. *Nat. Commun.* **5**,  
548 5775 (2014).

- 549 56. Koltai, T. Clusterin: a key player in cancer chemoresistance and its inhibition.  
550 *Onco. Targets. Ther.* **7**, 447–456 (2014).
- 551 57. Oliveira, C. S. F. *et al.* Cathepsin D protects colorectal cancer cells from acetate-  
552 induced apoptosis through autophagy-independent degradation of damaged  
553 mitochondria. *Cell Death Dis.* **6**, e1788–e1788 (2015).
- 554 58. Mahajan, U. M. *et al.* Cathepsin D Expression and Gemcitabine Resistance in  
555 Pancreatic Cancer. *JNCI Cancer Spectr.* **4**, (2020).
- 556 59. Liu, R., Wettersten, H. I., Park, S.-H. & Weiss, R. H. Small-molecule inhibitors of  
557 p21 as novel therapeutics for chemotherapy-resistant kidney cancer. *Future Med.*  
558 *Chem.* **5**, 991–994 (2013).
- 559 60. Xia, X. *et al.* Cytoplasmic p21 is a potential predictor for cisplatin sensitivity in  
560 ovarian cancer. *BMC Cancer* **11**, 399 (2011).
- 561 61. Koster, R. *et al.* Cytoplasmic p21 expression levels determine cisplatin resistance  
562 in human testicular cancer. *J. Clin. Invest.* **120**, 3594–3605 (2010).
- 563 62. Maiuthed, A. *et al.* Cytoplasmic p21 Mediates 5-Fluorouracil Resistance by  
564 Inhibiting Pro-Apoptotic Chk2. *Cancers (Basel)*. **10**, 373 (2018).
- 565 63. Morris-Hanon, O. *et al.* The Cell Cycle Inhibitors p21(Cip1) and p27(Kip1) Control  
566 Proliferation but Enhance DNA Damage Resistance of Glioma Stem Cells.  
567 *Neoplasia* **19**, 519–529 (2017).
- 568 64. Jain, A. *et al.* Epithelial membrane protein-1 is a biomarker of gefitinib resistance.  
569 *Proc. Natl. Acad. Sci. U. S. A.* **102**, 11858 LP – 11863 (2005).
- 570 65. Ariès, I. M. *et al.* EMP1, a novel poor prognostic factor in pediatric leukemia  
571 regulates prednisolone resistance, cell proliferation, migration and adhesion.

- 572        *Leukemia* **28**, 1828–1837 (2014).
- 573    66.    Lesuffleur, T. *et al.* Differential expression of the human mucin genes MUC1 to  
574        MUC5 in relation to growth and differentiation of different mucus-secreting HT-29  
575        cell subpopulations. *J. Cell Sci.* **106**, 771 LP – 783 (1993).
- 576    67.    Huang, D., Du, C., Ji, D., Xi, J. & Gu, J. Overexpression of LAMC2 predicts poor  
577        prognosis in colorectal cancer patients and promotes cancer cell proliferation,  
578        migration, and invasion. *Tumor Biol.* **39**, 1010428317705849 (2017).
- 579    68.    Asfaha, S. *et al.* Krt19(+)/Lgr5(-) Cells Are Radioresistant Cancer-Initiating Stem  
580        Cells in the Colon and Intestine. *Cell Stem Cell* **16**, 627–638 (2015).
- 581    69.    Wang, H. *et al.* LGALS3 Promotes Treatment Resistance in Glioblastoma and Is  
582        Associated with Tumor Risk and Prognosis. *Cancer Epidemiol. Biomarkers*  
583        *& Prev.* **28**, 760 LP – 769 (2019).
- 584    70.    Stewart, R. L. & O'Connor, K. L. Clinical significance of the integrin  $\alpha 6\beta 4$  in  
585        human malignancies. *Lab. Invest.* **95**, 976–986 (2015).
- 586    71.    Folgiero, V. *et al.* Induction of ErbB-3 Expression by  $\alpha 6\beta 4$  Integrin Contributes to  
587        Tamoxifen Resistance in ER $\beta$ 1-Negative Breast Carcinomas. *PLoS One* **3**, e1592  
588        (2008).
- 589    72.    Qiu, H. *et al.* Targeting CDH17 suppresses tumor progression in gastric cancer by  
590        downregulating Wnt/ $\beta$ -catenin signaling. *PLoS One* **8**, e56959–e56959 (2013).
- 591    73.    Atukorala, I. & Mathivanan, S. PO-066 Knockdown of cadherin 17 inactivates  
592        WNT signalling pathway and induces apoptosis in colorectal cancer cells. *ESMO*  
593        *Open* **3**, A47 (2018).
- 594    74.    Ilmer, M. *et al.* Cell surface galectin-3 defines a subset of chemoresistant

- 595            gastrointestinal tumor-initiating cancer cells with heightened stem cell  
596            characteristics. *Cell Death Dis.* **7**, e2337–e2337 (2016).
- 597    75.    Chung, L.-Y. *et al.* Galectin-3 augments tumor initiating property and  
598            tumorigenicity of lung cancer through interaction with  $\beta$ -catenin. *Oncotarget* **6**,  
599            4936–4952 (2015).
- 600    76.    Itahana, K. *et al.* A Role for p53 in Maintaining and Establishing the Quiescence  
601            Growth Arrest in Human Cells. *J. Biol. Chem.* **277**, 18206–18214 (2002).
- 602    77.    Meletis, K. *et al.* p53 suppresses the self-renewal of adult neural stem cells.  
603            *Development* **133**, 363 LP – 369 (2006).
- 604    78.    Liu, Y. *et al.* p53 regulates hematopoietic stem cell quiescence. *Cell Stem Cell* **4**,  
605            37–48 (2009).
- 606    79.    Lane, D. P. p53, guardian of the genome. *Nature* **358**, 15–16 (1992).
- 607    80.    Liu, W., Guan, M., Hu, T., Gu, X. & Lu, Y. Re-Expression of AKAP12 Inhibits  
608            Progression and Metastasis Potential of Colorectal Carcinoma In Vivo and In  
609            Vitro. *PLoS One* **6**, e24015 (2011).
- 610    81.    Lin, X., Nelson, P. & Gelman, I. H. SSeCKS, a major protein kinase C substrate  
611            with tumor suppressor activity, regulates G(1)-->S progression by controlling the  
612            expression and cellular compartmentalization of cyclin D. *Mol. Cell. Biol.* **20**,  
613            7259–7272 (2000).
- 614    82.    Gelman, I. H. Emerging Roles for SSeCKS/Gravin/AKAP12 in the Control of Cell  
615            Proliferation, Cancer Malignancy, and Barrierogenesis. *Genes Cancer* **1**, 1147–  
616            1156 (2010).
- 617    83.    Reggi, E. & Diviani, D. The role of A-kinase anchoring proteins in cancer

- 618 development. *Cell. Signal.* **40**, 143–155 (2017).
- 619 84. Hur, J. *et al.* CD82/KAI1 Maintains the Dormancy of Long-Term Hematopoietic  
620 Stem Cells through Interaction with DARC-Expressing Macrophages. *Cell Stem*  
621 *Cell* **18**, 508–521 (2016).
- 622 85. Xiong, Y. *et al.* p21 is a universal inhibitor of cyclin kinases. *Nature* **366**, 701–704  
623 (1993).
- 624 86. El-Deiry, W. WAF1, a potential mediator of p53 tumor suppression. *Cell* **75**, 817–  
625 825 (1993).
- 626 87. Vogelstein, B., Lane, D. & Levine, A. J. Surfing the p53 network. *Nature* **408**,  
627 307–310 (2000).
- 628 88. Wade Harper, J. The p21 Cdk-interacting protein Cip1 is a potent inhibitor of G1  
629 cyclin-dependent kinases. *Cell* **75**, 805–816 (1993).
- 630 89. Labalette, C. *et al.* The LIM-only protein FHL2 regulates cyclin D1 expression and  
631 cell proliferation. *J. Biol. Chem.* **283**, 15201–15208 (2008).
- 632 90. Martin, B. T. *et al.* FHL2 Regulates Cell Cycle-Dependent and Doxorubicin-  
633 Induced p21Cip1/Waf1 Expression in Breast Cancer Cells. *Cell Cycle* **6**, 1779–  
634 1788 (2007).
- 635 91. Hellerbrand. FHL2 suppresses growth and differentiation of the colon cancer cell  
636 line HT-29. *Oncol. Rep.* **23**, (2010).
- 637 92. Lee, S.-W., Kim, E.-J. & Um, S.-J. FHL2 mediates p53-induced transcriptional  
638 activation through a direct association with HIPK2. *Biochem. Biophys. Res.*  
639 *Commun.* **339**, 1056–1062 (2006).
- 640 93. An, B. C. *et al.* GPx3-mediated redox signaling arrests the cell cycle and acts as a



- 641 tumor suppressor in lung cancer cell lines. *PLoS One* **13**, e0204170–e0204170  
642 (2018).
- 643 94. Barrett, C. W. *et al.* Tumor suppressor function of the plasma glutathione  
644 peroxidase gpx3 in colitis-associated carcinoma. *Cancer Res.* **73**, 1245–1255  
645 (2013).
- 646 95. Wang, H. *et al.* p53-induced gene 3 mediates cell death induced by glutathione  
647 peroxidase 3. *J. Biol. Chem.* **287**, 16890–16902 (2012).
- 648 96. Polato, F. *et al.* DRAGO (KIAA0247), a new DNA damage-responsive, p53-  
649 inducible gene that cooperates with p53 as oncosuppressor. [Corrected]. *J. Natl.*  
650 *Cancer Inst.* **106**, dju053–dju053 (2014).
- 651 97. Huang, C.-J. *et al.* A predicted protein, KIAA0247, is a cell cycle modulator in  
652 colorectal cancer cells under 5-FU treatment. *J. Transl. Med.* **9**, 82 (2011).
- 653 98. Kim, S.-L. *et al.* Lipocalin 2 negatively regulates cell proliferation and epithelial to  
654 mesenchymal transition through changing metabolic gene expression in colorectal  
655 cancer. *Cancer Sci.* **108**, 2176–2186 (2017).
- 656 99. Chakraborty, S., Kaur, S., Guha, S. & Batra, S. K. The multifaceted roles of  
657 neutrophil gelatinase associated lipocalin (NGAL) in inflammation and cancer.  
658 *Biochim. Biophys. Acta - Rev. Cancer* **1826**, 129–169 (2012).
- 659 100. Chiang, K.-C. *et al.* Lipocalin 2 (LCN2) is a promising target for  
660 cholangiocarcinoma treatment and bile LCN2 level is a potential  
661 cholangiocarcinoma diagnostic marker. *Sci. Rep.* **6**, 36138 (2016).
- 662 101. Tu, S. P. *et al.* p53 inhibition of AP1-dependent TFF2 expression induces  
663 apoptosis and inhibits cell migration in gastric cancer cells. *Am. J. Physiol. Liver*

- 664        *Physiol.* **297**, G385–G396 (2009).
- 665    102. Dubeykovskaya, Z. *et al.* Neural innervation stimulates splenic TFF2 to arrest  
666        myeloid cell expansion and cancer. *Nat. Commun.* **7**, 10517 (2016).
- 667    103. Dubeykovskaya, Z. A. *et al.* Therapeutic potential of adenovirus-mediated TFF2-  
668        CTP-Flag peptide for treatment of colorectal cancer. *Cancer Gene Ther.* **26**, 48–  
669        57 (2019).
- 670    104. Thim, L. Trefoil peptides: from structure to function. *Cell. Mol. Life Sci. C.* **53**,  
671        888–903 (1997).
- 672    105. Bossenmeyer-Pourié, C. *et al.* The trefoil factor 1 participates in gastrointestinal  
673        cell differentiation by delaying G1-S phase transition and reducing apoptosis . *J.*  
674        *Cell Biol.* **157**, 761–770 (2002).
- 675    106. Huang, Y., Zhu, Y., Zhang, Z., Li, Z. & Kong, C. UNC5B mediates G2/M phase  
676        arrest of bladder cancer cells by binding to CDC14A and P53. *Cancer Gene Ther.*  
677        (2020). doi:10.1038/s41417-020-0175-x
- 678    107. Okazaki, S. Clinical significance of UNC5B expression in colorectal cancer. *Int. J.*  
679        *Oncol.* (2011). doi:10.3892/ijo.2011.1201
- 680    108. Kong, C. *et al.* Overexpression of UNC5B in bladder cancer cells inhibits  
681        proliferation and reduces the volume of transplantation tumors in nude mice. *BMC*  
682        *Cancer* **16**, 892 (2016).
- 683    109. Bersani, C., Xu, L.-D., Vilborg, A., Lui, W.-O. & Wiman, K. G. Wig-1 regulates cell  
684        cycle arrest and cell death through the p53 targets FAS and 14-3-3 $\sigma$ . *Oncogene*  
685        **33**, 4407–4417 (2014).
- 686    110. Hellborg, F. *et al.* Human wig-1, a p53 target gene that encodes a growth

- 687            inhibitory zinc finger protein. *Oncogene* **20**, 5466–5474 (2001).
- 688    111. Rouillard, A. D. *et al.* The harmonizome: a collection of processed datasets  
689            gathered to serve and mine knowledge about genes and proteins. *Database*  
690            **2016**, (2016).
- 691    112. Marreiros, A. *et al.* KAI1 promoter activity is dependent on p53, junB and AP2:  
692            evidence for a possible mechanism underlying loss of KAI1 expression in cancer  
693            cells. *Oncogene* **24**, 637–649 (2005).
- 694    113. Soutto, M. *et al.* TFF1 activates p53 through down-regulation of miR-504 in  
695            gastric cancer. *Oncotarget* **5**, 5663–5673 (2014).
- 696    114. Fischer, M. Census and evaluation of p53 target genes. *Oncogene* **36**, 3943–  
697            3956 (2017).
- 698    115. Miyamoto, T. *et al.* Lipocalin 2 Enhances Migration and Resistance against  
699            Cisplatin in Endometrial Carcinoma Cells. *PLoS One* **11**, e0155220–e0155220  
700            (2016).
- 701    116. Alexander, M. S. *et al.* CD82 Is a Marker for Prospective Isolation of Human  
702            Muscle Satellite Cells and Is Linked to Muscular Dystrophies. *Cell Stem Cell* **19**,  
703            800–807 (2016).
- 704    117. Georgakilas, A. G., Martin, O. A. & Bonner, W. M. p21: A Two-Faced Genome  
705            Guardian. *Trends Mol. Med.* **23**, 310–319 (2017).
- 706    118. Cheng, T. Hematopoietic Stem Cell Quiescence Maintained by p21<sup>cip1/waf1</sup>.  
707            *Science (80-. )*. **287**, 1804–1808 (2000).
- 708    119. Kippin, T. E., Martens, D. J. & van der Kooy, D. p21 loss compromises the relative  
709            quiescence of forebrain stem cell proliferation leading to exhaustion of their

- 710 proliferation capacity. *Genes Dev.* **19**, 756–767 (2005).
- 711 120. Smith, G. H. Label-retaining epithelial cells in mouse mammary gland divide  
712 asymmetrically and retain their template DNA strands. *Development* **132**, 681–  
713 687 (2005).
- 714 121. Wilson, A. *et al.* Hematopoietic stem cells reversibly switch from dormancy to self-  
715 renewal during homeostasis and repair. *Cell* **135**, 1118–29 (2008).
- 716 122. Cotsarelis, G., Sun, T.-T. & Lavker, R. M. Label-retaining cells reside in the bulge  
717 area of pilosebaceous unit: Implications for follicular stem cells, hair cycle, and  
718 skin carcinogenesis. *Cell* **61**, 1329–1337 (1990).
- 719 123. RUBIO, C. A. Arrest of Cell Proliferation in Budding Tumor Cells Ahead of the  
720 Invading Edge of Colonic Carcinomas. A Preliminary Report. *Anticancer Res.* **28**,  
721 2417–2420 (2008).
- 722 124. Harbaum, L. *et al.* Keratin 7 expression in colorectal cancer – freak of nature or  
723 significant finding? *Histopathology* **59**, 225–234 (2011).
- 724 125. De Smedt, L. *et al.* Expression profiling of budding cells in colorectal cancer  
725 reveals an EMT-like phenotype and molecular subtype switching. *Br. J. Cancer*  
726 **116**, 58–65 (2017).
- 727 126. Jung, A. *et al.* The Invasion Front of Human Colorectal Adenocarcinomas Shows  
728 Co-Localization of Nuclear  $\beta$ -Catenin, Cyclin D<sub>1</sub>, and p16<sup>INK4A</sup> and Is a  
729 Region of Low Proliferation. *Am. J. Pathol.* **159**, 1613–1617 (2001).
- 730 127. Dawson, H. *et al.* The apoptotic and proliferation rate of tumour budding cells in  
731 colorectal cancer outlines a heterogeneous population of cells with various  
732 impacts on clinical outcome. *Histopathology* **64**, 577–584 (2014).

- 733 128. Cho, I. J. *et al.* Mechanisms, Hallmarks, and Implications of Stem Cell  
734 Quiescence. *Stem cell reports* **12**, 1190–1200 (2019).
- 735 129. Schepeler, T., Mansilla, F., Christensen, L. L., Orntoft, T. F. & Andersen, C. L.  
736 Clusterin expression can be modulated by changes in TCF1-mediated Wnt  
737 signaling. *J. Mol. Signal.* **2**, 6 (2007).
- 738 130. Basu, S. *et al.* Increased expression of cathepsin D is required for L1-mediated  
739 colon cancer progression. *Oncotarget* **10**, 5217–5228 (2019).
- 740 131. Xu, J. *et al.*  $\beta$ -catenin regulates c-Myc and CDKN1A expression in breast cancer  
741 cells. *Mol. Carcinog.* **55**, 431–439 (2016).
- 742 132. Yao, H. *et al.* AV-65, a novel Wnt/ $\beta$ -catenin signal inhibitor, successfully  
743 suppresses progression of multiple myeloma in a mouse model. *Blood Cancer J.*  
744 **1**, e43–e43 (2011).
- 745 133. Pai, P., Rachagani, S., Dhawan, P. & Batra, S. K. Mucins and Wnt/ $\beta$ -catenin  
746 signaling in gastrointestinal cancers: an unholy nexus. *Carcinogenesis* **37**, 223–  
747 232 (2016).
- 748 134. Sánchez-Tilló, E. *et al.*  $\beta$ -catenin/TCF4 complex induces the epithelial-to-  
749 mesenchymal transition (EMT)-activator ZEB1 to regulate tumor invasiveness.  
750 *Proc. Natl. Acad. Sci.* **108**, 19204 LP – 19209 (2011).
- 751 135. Saha, S. K. *et al.* KRT19 directly interacts with  $\beta$ -catenin/RAC1 complex to  
752 regulate NUMB-dependent NOTCH signaling pathway and breast cancer  
753 properties. *Oncogene* **36**, 332–349 (2017).
- 754 136. Korkmaz, G. *et al.* LGALS3 and AXIN1 gene variants playing role in the Wnt/  $\beta$ -  
755 catenin signaling pathway are associated with mucinous component and tumor

- 756 size in colorectal cancer. *Bosn. J. basic Med. Sci.* **16**, 108–113 (2016).
- 757 137. Kinchen, J. *et al.* Structural Remodeling of the Human Colonic Mesenchyme in  
758 Inflammatory Bowel Disease. *Cell* **175**, 372–386.e17 (2018).
- 759 138. Camps, J. *et al.* Interstitial Cell Remodeling Promotes Aberrant Adipogenesis in  
760 Dystrophic Muscles. *Cell Rep.* **31**, (2020).
- 761 139. Avvisato, C. L. *et al.* Mechanical force modulates global gene expression and  $\beta$ -  
762 catenin signaling in colon cancer cells. *J. Cell Sci.* **120**, 2672 LP – 2682 (2007).
- 763 140. Wang, Y. *et al.* Anti-Cadherin-17 Antibody Modulates Beta-Catenin Signaling and  
764 Tumorigenicity of Hepatocellular Carcinoma. *PLoS One* **8**, e72386 (2013).
- 765 141. Shimura, T. *et al.* Galectin-3, a Novel Binding Partner of  $\beta$ -Catenin. *Cancer Res.*  
766 **64**, 6363 LP – 6367 (2004).
- 767 142. Regan, J. L. Cell fate in colon cancer stem cells: To GLI or not to GLI? *Mol. Cell.*  
768 *Oncol.* **5**, e1445940–e1445940 (2018).
- 769 143. Vousden, K. H. & Lane, D. P. p53 in health and disease. *Nat. Rev. Mol. Cell Biol.*  
770 **8**, 275–283 (2007).
- 771 144. Jain, A. K. & Barton, M. C. p53: emerging roles in stem cells, development and  
772 beyond. *Development* **145**, dev158360 (2018).
- 773 145. Tosoni, D. *et al.* The Numb/p53 circuitry couples replicative self-renewal and  
774 tumor suppression in mammary epithelial cells. *J. Cell Biol.* **211**, 845–862 (2015).
- 775 146. Zhao, Z. *et al.* p53 loss promotes acute myeloid leukemia by enabling aberrant  
776 self-renewal. *Genes Dev.* **24**, 1389–1402 (2010).
- 777 147. Tschaharganeh, D. F. *et al.* p53-Dependent Nestin Regulation Links Tumor  
778 Suppression to Cellular Plasticity in Liver Cancer. *Cell* **158**, 579–592 (2014).

- 779 148. Freed-Pastor, W. A. *et al.* Mutant p53 disrupts mammary tissue architecture via  
780 the mevalonate pathway. *Cell* **148**, 244–258 (2012).
- 781 149. McConnell, A. M. *et al.* p53 Regulates Progenitor Cell Quiescence and  
782 Differentiation in the Airway. *Cell Rep.* **17**, 2173–2182 (2016).
- 783 150. Zheng, H. *et al.* p53 and Pten control neural and glioma stem/progenitor cell  
784 renewal and differentiation. *Nature* **455**, 1129–1133 (2008).
- 785 151. Flamini, V. *et al.* The Satellite Cell Niche Regulates the Balance between  
786 Myoblast Differentiation and Self-Renewal via p53. *Stem cell reports* **10**, 970–983  
787 (2018).
- 788 152. Deng, C., Zhang, P., Wade Harper, J., Elledge, S. J. & Leder, P. Mice Lacking  
789 p21CIP1/WAF1 undergo normal development, but are defective in G1 checkpoint  
790 control. *Cell* **82**, 675–684 (1995).
- 791 153. Brugarolas, J. *et al.* Radiation-induced cell cycle arrest compromised by p21  
792 deficiency. *Nature* **377**, 552–557 (1995).
- 793 154. Kobayashi, A. *et al.* Bone morphogenetic protein 7 in dormancy and metastasis of  
794 prostate cancer stem-like cells in bone. *J. Exp. Med.* **208**, 2641–2655 (2011).
- 795 155. Takeishi, S. *et al.* Ablation of Fbxw7 Eliminates Leukemia-Initiating Cells by  
796 Preventing Quiescence. *Cancer Cell* **23**, 347–361 (2013).
- 797 156. Levine, A. J. Targeting Therapies for the p53 Protein in Cancer Treatments. *Annu.*  
798 *Rev. Cancer Biol.* **3**, 21–34 (2019).
- 799 157. Jackson, J. G. *et al.* p53-Mediated Senescence Impairs the Apoptotic Response  
800 to Chemotherapy and Clinical Outcome in Breast Cancer. *Cancer Cell* **21**, 793–  
801 806 (2012).

- 802 158. Ungerleider, N. A. *et al.* Breast cancer survival predicted by TP53 mutation status  
803 differs markedly depending on treatment. *Breast Cancer Res.* **20**, 115 (2018).
- 804 159. Rogel, A., Popliker, M., Webb, C. G. & Oren, M. p53 cellular tumor antigen:  
805 analysis of mRNA levels in normal adult tissues, embryos, and tumors. *Mol. Cell.*  
806 *Biol.* **5**, 2851 LP – 2855 (1985).
- 807 160. Webster, M. R. *et al.* Paradoxical Role for Wild-Type p53 in Driving Therapy  
808 Resistance in Melanoma. *Mol. Cell* **77**, 633-644.e5 (2020).
- 809 161. Choudhury, A. R. *et al.* Cdkn1a deletion improves stem cell function and lifespan  
810 of mice with dysfunctional telomeres without accelerating cancer formation. *Nat.*  
811 *Genet.* **39**, 99–105 (2007).
- 812 162. El-Deiry, W. S. p21(WAF1) Mediates Cell-Cycle Inhibition, Relevant to Cancer  
813 Suppression and Therapy. *Cancer Res.* **76**, 5189–5191 (2016).
- 814 163. Weiss, R. H. p21<sup>Waf1/Cip1</sup> as a therapeutic target in breast and other cancers.  
815 *Cancer Cell* **4**, 425–429 (2003).
- 816 164. Viale, A. *et al.* Cell-cycle restriction limits DNA damage and maintains self-  
817 renewal of leukaemia stem cells. *Nature* **457**, 51–56 (2009).
- 818 165. Hui Tian, E. K. W. and T. J. J. p21WAF1/CIP1 Antisense Therapy Radiosensitizes  
819 Human Colon Cancer by Converting Growth Arrest to Apoptosis. *Cancer Res* **60**,  
820 679–684 (2000).
- 821 166. Kokunai, T., Urui, S., Tomita, H. & Tamaki, N. Overcoming of Radioresistance in  
822 Human Gliomas by p21WAF1/CIP1 Antisense Oligonucleotide. *J. Neurooncol.* **51**,  
823 111–119 (2001).
- 824 167. Joanna K Sax, Bipin C Dash, Rui Hong, David T Dicker, W. S. E.-D. The Cyclin-



- 825           Dependent Kinase Inhibitor Butyrolactone Is a Potent Inhibitor of p21 WAF1/CIP1  
826           Expression. *Cell Cycle* **1**, 87–93 (2002).
- 827 168. Park, S.-H., Wang, X., Liu, R., Lam, K. S. & Weiss, R. H. High throughput  
828           screening of a small molecule one-bead-one-compound combinatorial library to  
829           identify attenuators of p21 as chemotherapy sensitizers. *Cancer Biol. Ther.* **7**,  
830           2015–2022 (2008).
- 831 169. Inoue, H., Hwang, S. H., Wecksler, A. T., Hammock, B. D. & Weiss, R. H.  
832           Sorafenib attenuates p21 in kidney cancer cells and augments cell death in  
833           combination with DNA-damaging chemotherapy. *Cancer Biol. Ther.* **12**, 827–836  
834           (2011).
- 835 170. Wettersten, H. I. *et al.* A novel p21 attenuator which is structurally related to  
836           sorafenib. *Cancer Biol. Ther.* **14**, 278–285 (2013).
- 837 171. Sato, T. *et al.* Long-term Expansion of Epithelial Organoids From Human Colon,  
838           Adenoma, Adenocarcinoma, and Barrett’s Epithelium. *Gastroenterology* **141**,  
839           1762–1772 (2011).
- 840 172. Love, M. I., Huber, W. & Anders, S. Moderated estimation of fold change and  
841           dispersion for RNA-seq data with DESeq2. *Genome Biol.* **15**, 550 (2014).
- 842 173. Nagy, Á., Lánczky, A., Menyhárt, O. & Györffy, B. Validation of miRNA prognostic  
843           power in hepatocellular carcinoma using expression data of independent  
844           datasets. *Sci. Rep.* **8**, 9227 (2018).
- 845 174. Ashburner, M. *et al.* Gene Ontology: tool for the unification of biology. *Nat. Genet.*  
846           **25**, 25–29 (2000).
- 847 175. The Gene Ontology Consortium. The Gene Ontology Resource: 20 years and still

- 848 GOing strong. *Nucleic Acids Res.* **47**, D330–D338 (2018).
- 849 176. Cumming, G., Fidler, F. & Vaux, D. L. Error bars in experimental biology. *J Cell*  
850 *Biol* **177**, 7–11 (2007).
- 851 177. Subramanian, A. *et al.* Gene set enrichment analysis: a knowledge-based  
852 approach for interpreting genome-wide expression profiles. *Proc. Natl. Acad. Sci.*  
853 *U. S. A.* **102**, 15545–15550 (2005).
- 854 178. Liberzon, A. *et al.* The Molecular Signatures Database Hallmark Gene Set  
855 Collection. *Cell Syst.* **1**, 417–425 (2015).
- 856 179. Benjamini, Y. & Hochberg, Y. Controlling the false discovery rate: a practical and  
857 powerful approach to multiple testing. *J R Stat. Soc B* **57**, 289–300 (1995).

858

## 859 **FIGURE LEGENDS**

860

### 861 **Figure 1. Colon cancer PDOs contain a subpopulation of non-cycling cells**

862 (A) Phase contrast image of colon cancer PDOs labelled with cell-tracker dye CM-DiI  
863 after 72 h (Bar = 75  $\mu$ m) (see also Table S1). (B) Representative FACS plots of EdU cell  
864 cycle analysis of 151-ML-M PDO cells at 2 h (left hand side) and 72 h (right hand side)  
865 after labelling. (C) Percentage of cells ( $\pm$ SD) in G0/1, G2/M and S Phase at 2 h and 72  
866 h post EdU labelling in PDO models 151-ML-M, 162-MW-P, 195-CB-P, 249-CB-P, 278-  
867 ML-P and 302-CB-M (data from three independent experiments).

868

869 **Figure 2. Non-cycling PDO cells are quiescent CSCs that can re-enter cell cycle and**  
870 **persist long-term *in vivo***

871 (A) Representative FACS plot of PKH26 labelled 278-ML-P PDO cells after 12 h (middle  
872 panel) and 12 days (right side panel) compared to non-labelled control (left side panel).  
873 (B) Frequency ( $\pm$ SD) of PKH26<sup>Positive</sup> LRCs in PDO models after 12 days (data from 5  
874 independent experiments). (C) FACS histograms demonstrating frequency of  
875 PKH26<sup>Positive</sup> cells in 151-ML-M PDOs at 12 h (left side panel) and 12 days (middle panel)  
876 after staining and 24 days (right side panel) after FACS isolation and serial replating of  
877 PKH26<sup>Positive</sup> cells from 12 day cultures. (D) Phase contrast of unlabeled PDOs (negative  
878 control) (Bar = 100  $\mu$ m) and (E) immunofluorescence images of PKH26 labelled PDOs at  
879 12 h and 12 days (left and middle panels) and 24 days after FACS isolation and serial re-  
880 plating of PKH26<sup>Positive</sup> LRCs from 12 day cultures (right side panel). Cells are stained for  
881 F-ACTIN (green) and nuclei are counterstained with DAPI (blue) (Bars = 20  $\mu$ m). (F) Mean  
882 colony size ( $\pm$ SD) of PKH26<sup>Negative</sup> and PKH26<sup>Positive</sup> cell derived PDOs in Matrigel culture.  
883 Data from three independent experiments. \*\*p-value: < 0.01 (t test). (G) Limiting dilution  
884 spheroid formation assay of PKH26<sup>Negative</sup> and PKH26<sup>Positive</sup> cells. Data from three  
885 independent experiments. The p-values for pairwise tests of differences in CSC  
886 frequencies between PKH26<sup>Negative</sup> and PKH26<sup>Positive</sup> cells in 151-ML-M, 162-MW-P, 195-  
887 CB-P, 249-CB-P, 278-ML-P and 302-CB-M tumors are  $1.27 \times 10^{-13}$ ,  $1.87 \times 10^{-5}$ ,  $6.42 \times$   
888  $10^{-11}$ ,  $1.12 \times 10^{-10}$ ,  $3.5 \times 10^{-14}$ ,  $6.14 \times 10^{-12}$ , respectively. (H) Immunofluorescence image  
889 of a frozen PDX section derived from 1,000 PKH26 labelled 195-CB-P PDO cells 80 days  
890 post transplantation. Magnified region indicates a long-term label-retaining PKH26<sup>Positive</sup>  
891 cell. Cells are stained for  $\alpha$ -tubulin (green) and nuclei are counterstained with DAPI (blue)  
892 (Bar = 100 $\mu$ m).  
893

894 **Figure 3. PKH26<sup>Positive</sup> qCSCs are enriched for stem cell associated gene sets and**  
895 **p53-interacting negative regulators of proliferation and have downregulated**  
896 **expression of cell cycle genes**

897 (A) RNA sequencing generated gene set enrichment analysis for organ development  
898 (nominal p-value = < 0.0005), cell development (nominal p-value = < 0.0005), nervous  
899 system development (nominal p-value = < 0.0005), embryonic development (nominal p-  
900 value = 0.03), placenta (nominal p-value = < 0.0005), epithelial mesenchymal transition  
901 (nominal p-value = < 0.0005), p53 pathway (nominal p-value = < 0.0005), TNFa signaling  
902 via NFkB (nominal p-value = < 0.0005), Wnt signaling pathway (nominal p-value = 0.002)  
903 and hedgehog signaling pathway (nominal p-value = 0.002) in 12 day PKH26<sup>Positive</sup> LRCs  
904 (compared to PKH26<sup>Negative</sup> cells) from PDO models 151-ML-M, 162-MW-P, 195-CB-P,  
905 249-CB-P, 278-ML-P and 302-CB-M (n = 4 separate cell preparations). (B) Gene ontology  
906 (GO) groups downregulated in PKH26<sup>Positive</sup> LRCs. (C) Cell Cycle, transcription and  
907 protein synthesis GO terms downregulated in PKH26<sup>Positive</sup> LRCs. (D) RNA sequencing  
908 generated normalized counts for negative cell cycle regulator and p53 target genes  
909 *AKAP12*, *CD82*, *CDKN1A*, *FHL2*, *GPX3*, *KIAA0247*, *LCN2*, *TFF2*, *UNC5B* and *ZMAT3* in  
910 PKH26<sup>Negative</sup> and PKH26<sup>Positive</sup> cells. (E) Venn diagram shows the number of upregulated  
911 RNA-sequencing generated transcripts identified in intestinal revSCs (50 genes; log fold  
912 change > 0.25, p-value < 0.05) by Ayyaz *et al.* (2019)<sup>15</sup> and in PKH26<sup>Positive</sup> qCSCs (255  
913 genes; log<sub>2</sub> fold change > 0.586, p-value < 0.05) and upregulated in both revSCs and  
914 PKH26<sup>Positive</sup> qCSCs (14 genes; representation factor 21.8, p-value < 1.452e-15). The  
915 representation factor is the number of overlapping genes divided by the expected number  
916 of overlapping genes drawn from two independent groups. A representation factor > 1

917 indicates more overlap than expected of two independent groups. (F) Table shows the 14  
918 genes upregulated in both revSCs and PKH26<sup>Positive</sup> qCSCs. \*ITM2C is a paralog of revSC  
919 enriched Itm2b. (See also Figure S1).

920

921 **Figure 4. p53 target genes are indicators of poor prognosis and required for the**  
922 **maintenance of PKH26<sup>Positive</sup> quiescent CSCs**

923 (A) Kaplan-Meier survival curves for *AKAP12*, *CD82*, *CDKN1A*, *FHL2*, *GPX3*, *KIAA0247*,  
924 *LCN2*, *TFF2*, *UNC5B* and *ZMAT3* in colorectal cancer patients comparing lower quartile  
925 to upper quartile (logrank p-values = 2.2E-06, 0.004, 8.1E-05, 0.00012, 0.0003, 0.049,  
926 0.00018, 5.7E-05 and 0.3, respectively). Of these, higher *AKAP12*, *CD82*, *CDKN1A*,  
927 *FHL2*, *GPX3*, *KIAA0247*, *LCN2*, *TFF2* and *UNC5B* are significant at FDR < 10%. Results  
928 based upon data generated by the Kaplan-Meier Plotter (kmplot.com)<sup>173</sup>. (B)  
929 Representative FACS plot of PKH26 labelled 151-ML-M Control-GFP cells (top row) and  
930 shRNA CDKN1A-GFP cells (bottom row) after 12 h and 12 days. (C) Frequency ( $\pm$ SD) of  
931 PKH26<sup>Positive</sup> LRCs in shRNA CDKN1A PDO models after 12 days compared to control  
932 virus transduced cells (data from 3 independent experiments). (See also Figure S2).

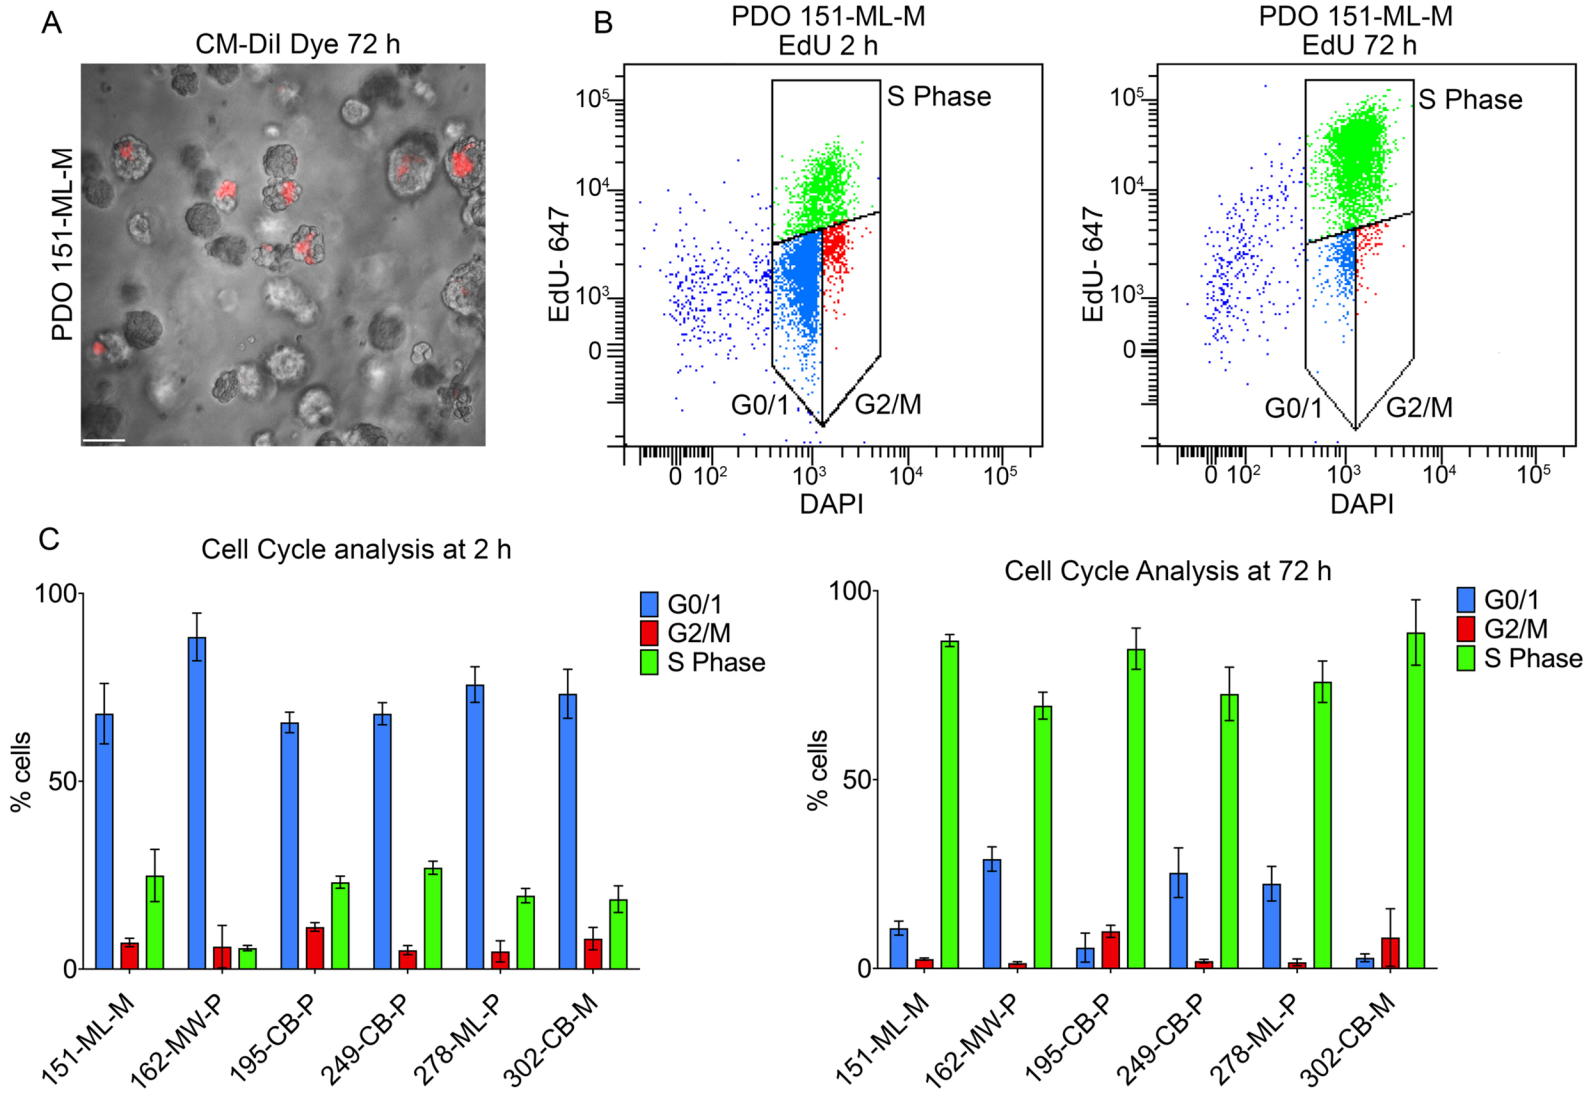



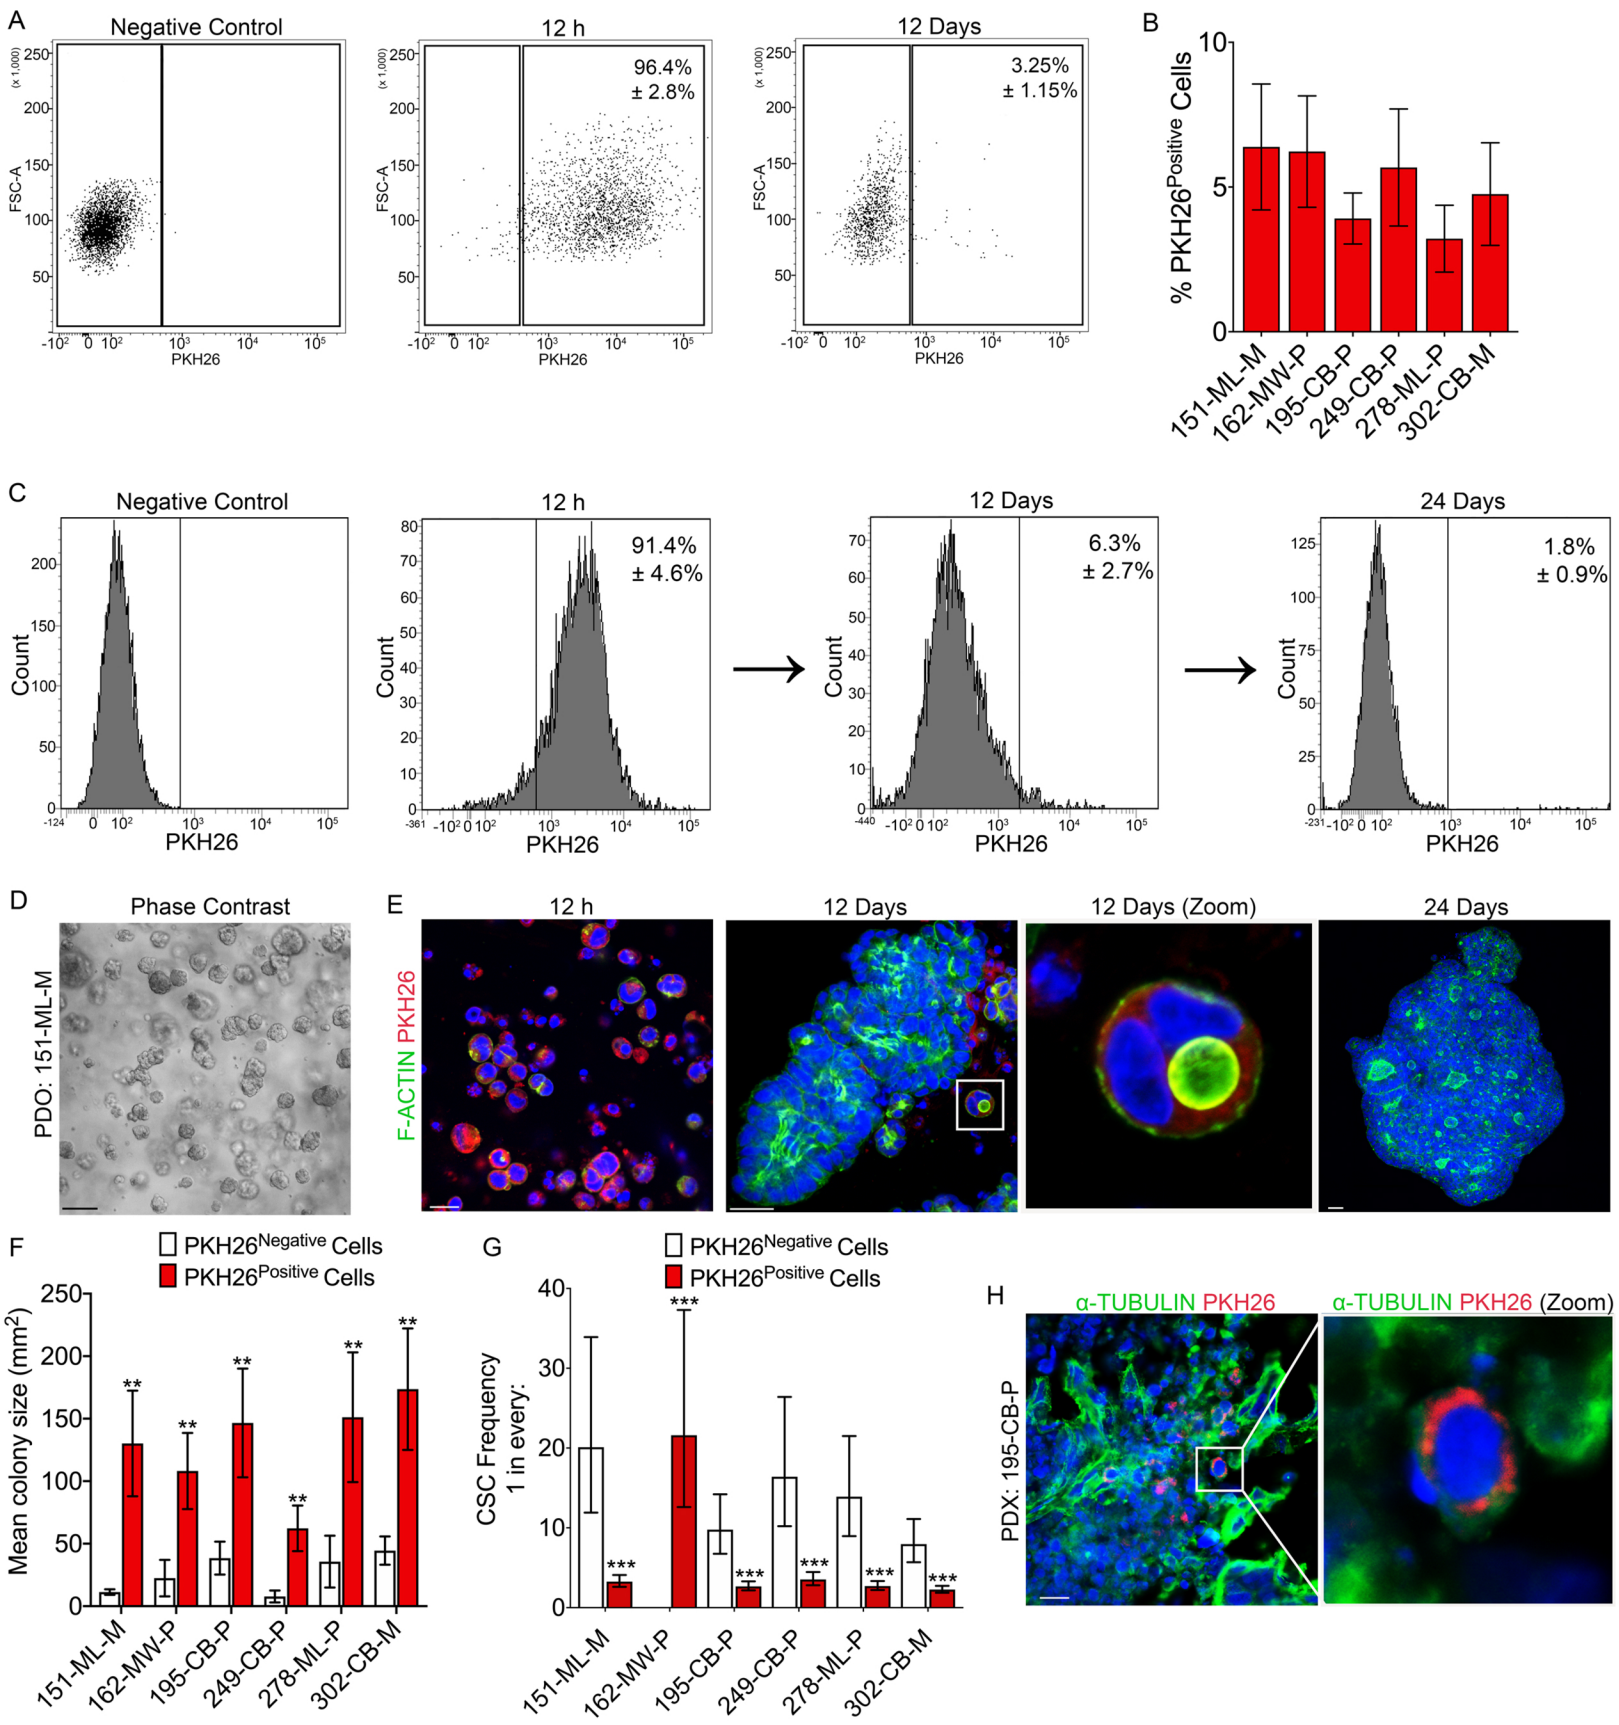

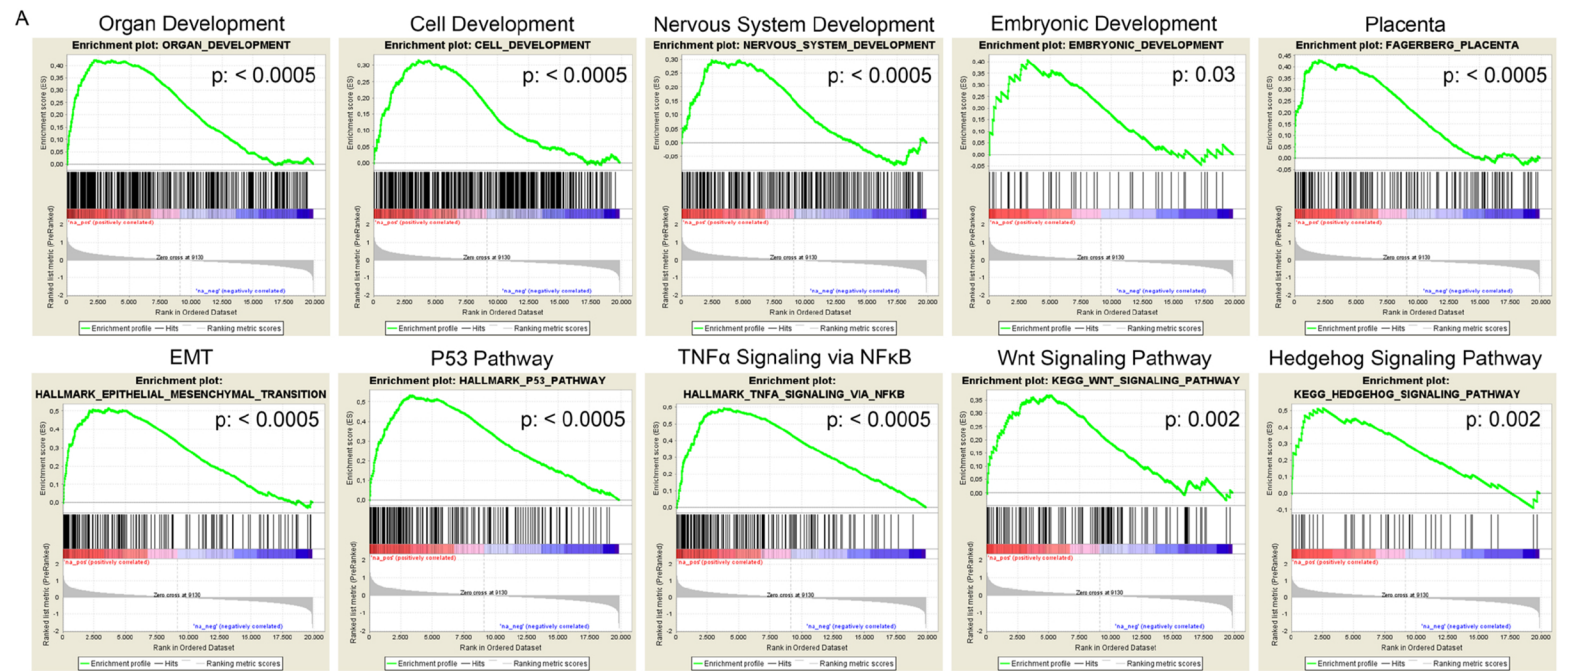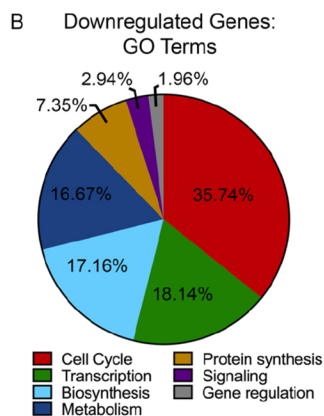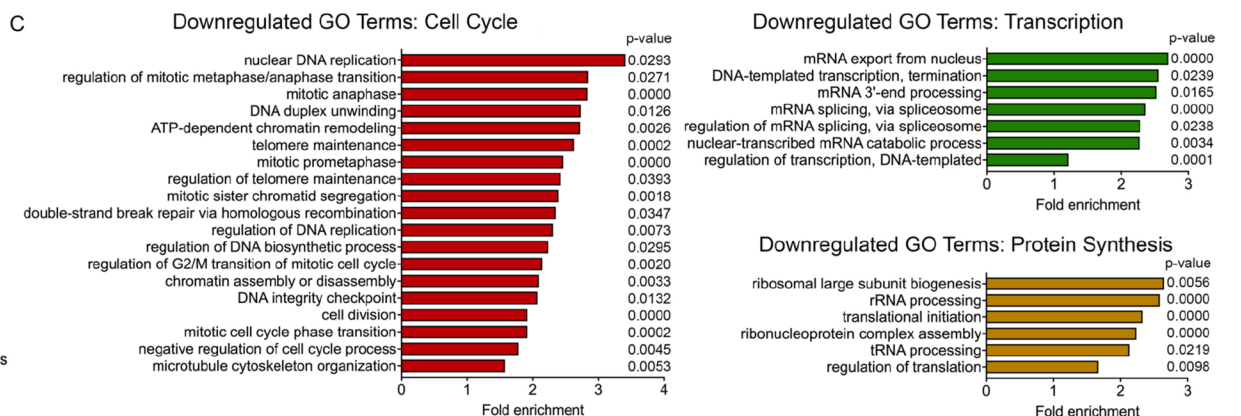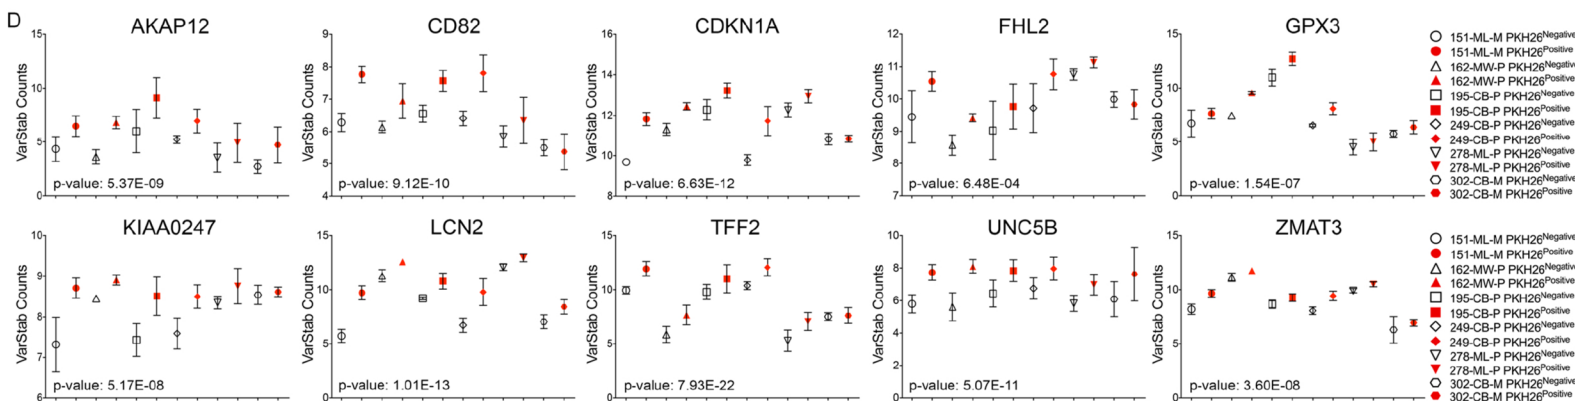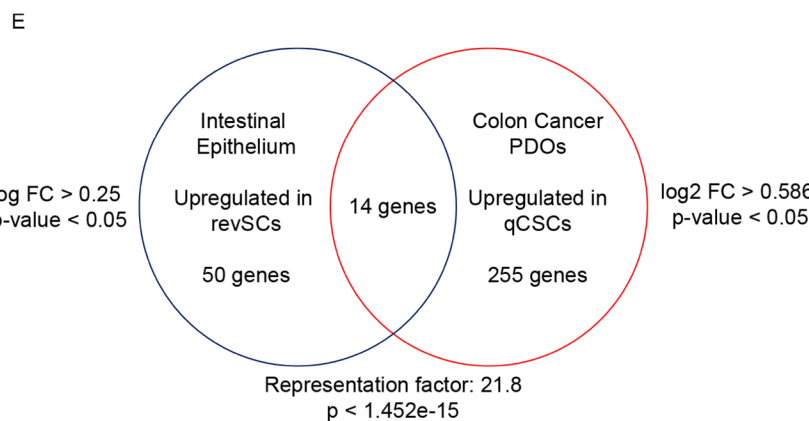

**F**

| Gene Name | log2 Fold Change | p-value  |
|-----------|------------------|----------|
| CTSD      | 1.0362917        | 3.55E-12 |
| CDKN1A    | 1.1134356        | 6.63E-12 |
| GSN       | 0.93978          | 5.67E-10 |
| ITGB4     | 0.74492633       | 2.08E-07 |
| CDH17     | 0.9418327        | 3.78E-07 |
| LGALS3    | 0.6010856        | 1.13E-06 |
| KRT19     | 0.6341487        | 2.29E-05 |
| MUC3A     | 0.7705268        | 3.13E-05 |
| ITM2C*    | 0.5946194        | 1.57E-04 |
| AHNAK2    | 0.9683501        | 3.65E-04 |
| CLU       | 0.9644593        | 1.03E-03 |
| F3        | 0.8337223        | 1.27E-03 |
| LAMC2     | 0.70564735       | 2.79E-03 |
| EMP1      | 0.864138         | 1.06E-02 |



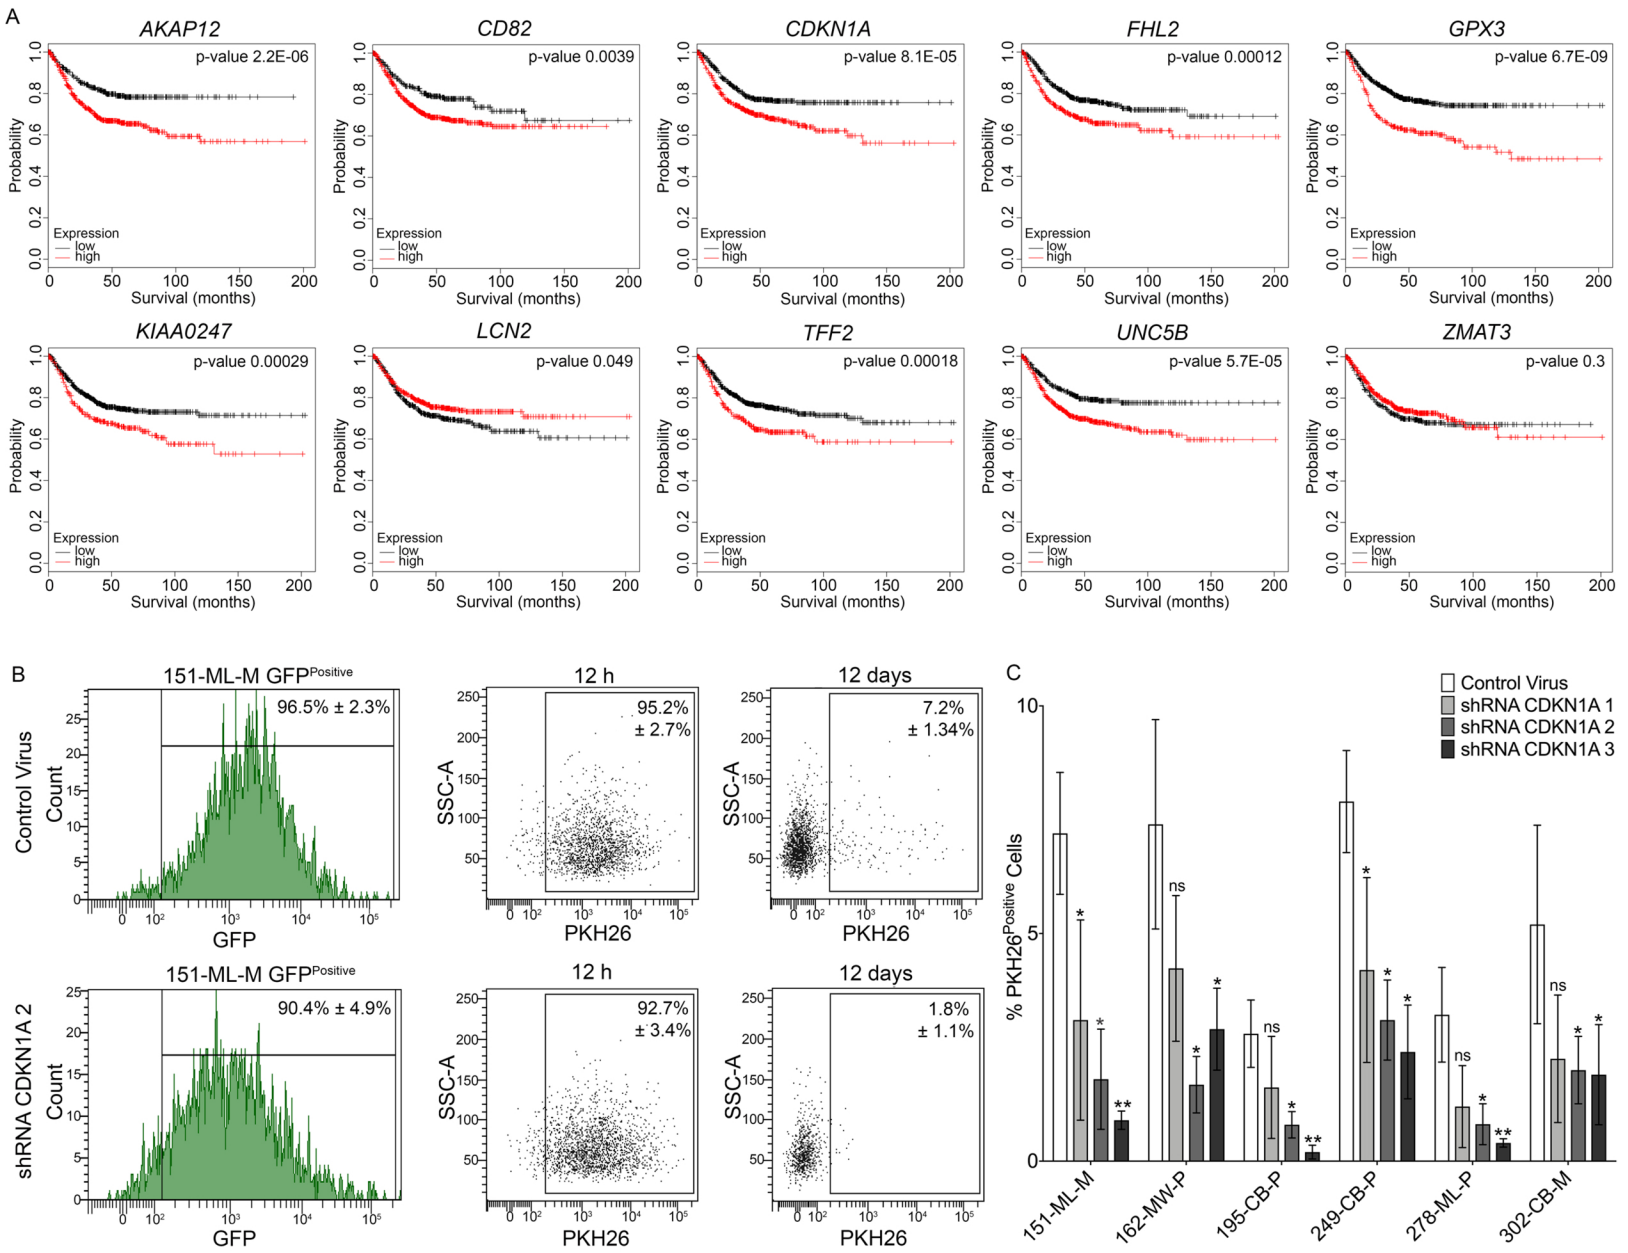

Supplemental Information

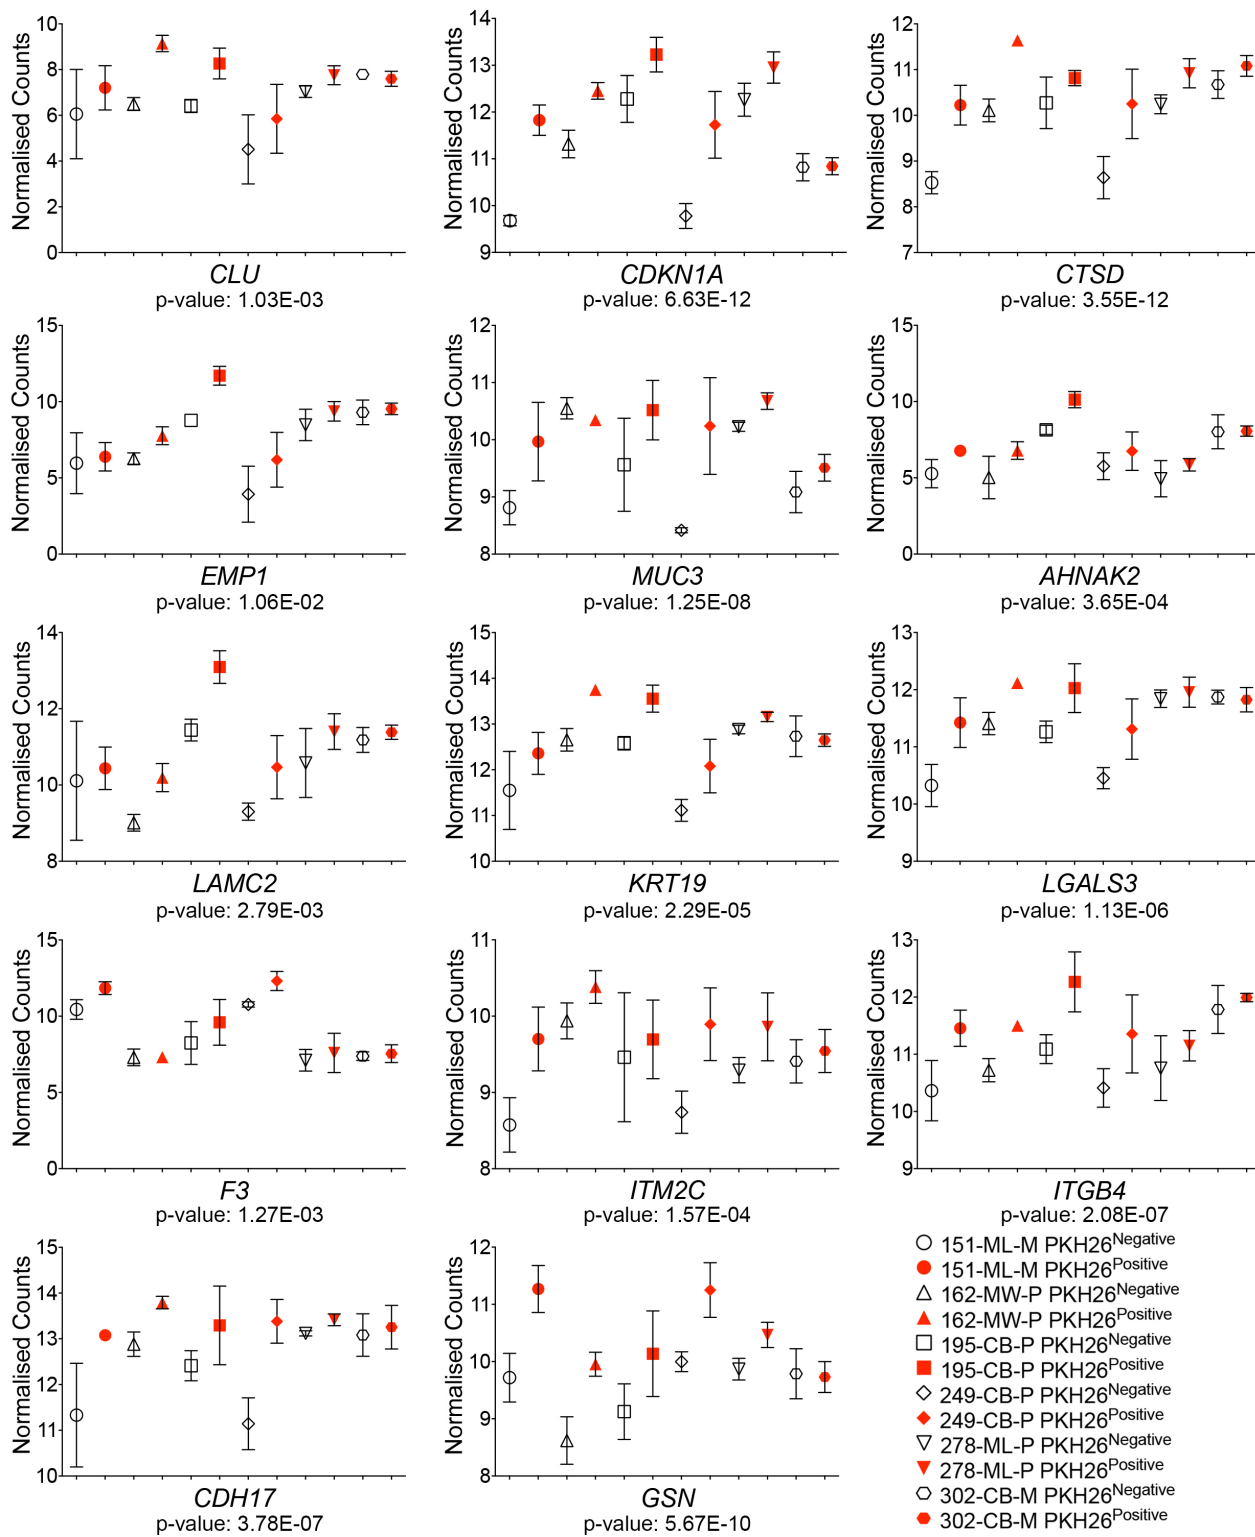

**Figure S1: RNA-sequencing generated normalized counts for differentially expressed and common revSC<sup>1</sup> molecular signature genes in PKH26<sup>Positive</sup> qCSCs compared to PKH26<sup>Negative</sup> cells. Related to Figure 3.**

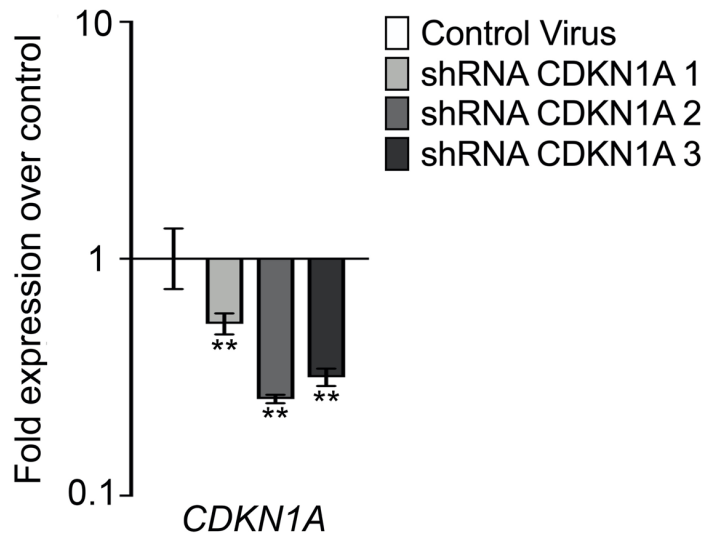

**Figure S2: Fold expression of CDKN1A ( $\pm$ 95% confidence intervals) in shRNA CDKN1A transduced PDOs from three independent experiments. Related to Figure 4.**

Significant differences are \*p-value < 0.05; \*\*p-value < 0.01 and were determined by inspection of error bars as described by Cumming et al. (2007)<sup>2</sup>.

| Patient Model | Origin                           | TNM stage      | Stage | P53 Status   |
|---------------|----------------------------------|----------------|-------|--------------|
| 151-ML-M      | Liver                            | T2 N0 M0 , M1a | IVA   | *SNV (G266E) |
| 162-MW-P      | Sigmoid colon & descending colon | T3 N0 M0       | IIA   | Wild type    |
| 195-CB-P      | Sigmoid colon                    | T4a N2b M1a    | IVA   | *SNV (C135F) |
| 249-CB-P      | Ascending colon                  | T3 N0 M0       | III   | Wild type    |
| 278-ML-P      | Sigmoid colon & descending colon | T4a N0 M0      | IIB   | *SNV (R273C) |
| 302-CB-M      | Liver                            | T3 N1a M1a     | IVA   | Wild type    |

**Table S1 Tissue Origin, TNM Classification and P53 status of tumors. Related to Figure 1.**

T: primary tumor size, N: regional lymph nodes involved, M: distant metastasis, \*SNV: non-synonymous single nucleotide variant

| LENTIVIRUS | SIGMA PRODUCT    | PRODUCT NAME                                           | VECTOR                | TRC NUMBER     |
|------------|------------------|--------------------------------------------------------|-----------------------|----------------|
| Control    | SHC003V          | MISSION® tGFP™ Positive Control Transduction Particles | -pLKO.1-puro-CMV-tGFP | NA             |
| shCDKN1A 1 | SHCLNV-NM_000389 | CDKN1A MISSION shRNA Lentiviral Transduction Particles | -hPGK-Puro-CMV-tGFP   | TRCN0000040123 |
| shCDKN1A 2 | SHCLNV-NM_000399 | CDKN1A MISSION shRNA Lentiviral Transduction Particles | -hPGK-Puro-CMV-tGFP   | TRCN0000287021 |
| shCDKN1A 3 | SHCLNV-NM_000399 | CDKN1A MISSION shRNA Lentiviral Transduction Particles | -hPGK-Puro-CMV-tGFP   | TRCN0000287091 |

**Table S2. Lentiviral Transduction Particles. Related to Figure 4**

| Symbol | Gene Name                                | UniGene ID | TaqMan® Gene Expression Assay |
|--------|------------------------------------------|------------|-------------------------------|
| CDKN1A | cyclin dependent kinase inhibitor 1A     | Hs.370771  | Hs00355782_m1                 |
| GAPDH  | glyceraldehyde-3-phosphate dehydrogenase | Hs.544577  | Hs02758991_g1                 |

**Table S3. Taqman® Gene Expression Assays. Related to Figure 4.**

## Supplementary Data 1

## References

1. Ayyaz, A., Kumar, S., Sangiorgi, B., Ghoshal, B., Gosio, J., Ouladan, S., Fink, M., Barutcu, S., Trcka, D., Shen, J., Chan, K., Wrana, J. L. & Gregorieff, A. Single-cell transcriptomes of the regenerating intestine reveal a revival stem cell. *Nature* **569**, 121–125 (2019).
2. Cumming, G., Fidler, F. & Vaux, D. L. Error bars in experimental biology. *J Cell Biol* **177**, 7–11 (2007).
